1 **Systematics and geographical distribution of *Galba* species, a group of**  
2 **cryptic and worldwide freshwater snails**

3 Pilar Alda<sup>1,2,3</sup>, Manon Lounnas<sup>2</sup>, Antonio A. Vázquez<sup>2,4</sup>, Rolando Ayaquí<sup>5</sup>, Manuel  
4 Calvopiña<sup>6</sup>, Maritza Celi-Erazo<sup>7</sup>, Robert T. Dillon Jr.<sup>8</sup>, Luisa Carolina González  
5 Ramírez<sup>9</sup>, Eric S. Loker<sup>10</sup>, Jenny Muzzio-Aroca<sup>11</sup>, Alberto Orlando Nárvaez<sup>11,12</sup>, Oscar  
6 Noya<sup>13</sup>, Andrés Esteban Pereira<sup>14</sup>, Luiggi Martini Robles<sup>15</sup>, Richar Rodríguez-  
7 Hidalgo<sup>7,16</sup>, Nelson Uribe<sup>14</sup>, Patrice David<sup>17</sup>, Philippe Jarne<sup>17</sup>, Jean-Pierre Pointier<sup>18</sup>,  
8 Sylvie Hurtrez-Boussès<sup>2,19</sup>

9 <sup>1</sup> Laboratorio de Zoología de Invertebrados I, Departamento de Biología, Bioquímica y  
10 Farmacia, Universidad Nacional del Sur. San Juan No. 670, B8000ICN Bahía Blanca,  
11 Buenos Aires, Argentina.

12 <sup>2</sup> MIVEGEC, University of Montpellier, CNRS, IRD, Montpellier, France.

13 <sup>3</sup> Consejo Nacional de Investigaciones Científicas y Técnicas (CONICET), Argentina.

14 <sup>4</sup> Laboratory of Malacology, Institute of Tropical Medicine “Pedro Kourí”, Autopista  
15 Novia del Mediodía km 6, La Habana, Cuba.

16 <sup>5</sup> Departamento de Microbiología y Patología, Facultad de Medicina, Universidad  
17 Nacional de San Agustín de Arequipa, Peru.

18 <sup>6</sup> Carrera de Medicina, Facultad de Ciencias de la Salud, Universidad de Las Américas,  
19 Quito, Ecuador.

20 <sup>7</sup> Instituto de Investigación en Salud Pública y Zoonosis - CIZ, Universidad Central de  
21 Ecuador, Quito, Ecuador.

22 <sup>8</sup> Freshwater Gastropods of North America Project, P.O. Box 31532, Charleston, SC  
23 29417, USA.

24 <sup>9</sup> Grupo de Investigación “Análisis de Muestras Biológicas y Forenses” Laboratorio  
25 Clínico, Facultad de Ciencias de la Salud, Universidad Nacional de Chimborazo,  
26 Ecuador.

- 27 <sup>10</sup> Center for Evolutionary and Theoretical Immunology, Department of Biology,  
28 University of New Mexico, Albuquerque, NM87131, USA.
- 29 <sup>11</sup> Instituto Nacional de Investigación en Salud Pública INSPI, Guayaquil, Ecuador.
- 30 <sup>12</sup> Universidad Agraria del Ecuador, Facultad de Medicina Veterinaria y Zootecnia,  
31 Guayaquil, Ecuador.
- 32 <sup>13</sup> Sección de Biohelmintiasis, Instituto de Medicina Tropical, Facultad de Medicina,  
33 Universidad Central de Venezuela. Centro para Estudios Sobre Malaria, Instituto de  
34 Altos Estudios “Dr. Arnoldo Gabaldón”-Instituto Nacional de Higiene “Rafael Rangel”  
35 del Ministerio del Poder Popular para la Salud. Caracas, Venezuela.
- 36 <sup>14</sup> Grupo de Investigación en Epidemiología Molecular (GIEM), Escuela de  
37 Microbiología, Facultad de Salud, Universidad Industrial de Santander, Bucaramanga,  
38 Colombia.
- 39 <sup>15</sup> Laboratorio de Parasitología Luigi Martini y colaboradores, Guayaquil, Ecuador.
- 40 <sup>16</sup> Facultad de Medicina Veterinaria y Zootecnia, Universidad Central del Ecuador,  
41 Quito, Ecuador.
- 42 <sup>17</sup> Centre d’Ecologie Fonctionnelle et d’Evolution, UMR 5175, CNRS – Université de  
43 Montpellier – Université Paul Valéry Montpellier – EPHE - IRD, 1919 route de Mende,  
44 34293, Montpellier Cedex 5, France.
- 45 <sup>18</sup> PSL Research University, USR 3278 CNRS–EPHE, CRIOBE Université de  
46 Perpignan, Perpignan, France.
- 47 <sup>19</sup> Département de Biologie–Ecologie, Faculté des Sciences, Université Montpellier,  
48 Montpellier, France.
- 49
- 50 To whom correspondence should be addressed: **pilaralda@gmail.com** (P. Alda)

51 **Key words:** systematics, distribution, America, Lymnaeidae, *Galba*, vector snails,

52 biological invasions.

53

54 **Abstract**

55 Cryptic species can present a significant challenge to the application of systematic and  
56 biogeographic principles, especially if they are invasive or transmit parasites or  
57 pathogens. Detecting cryptic species requires a pluralistic approach in which molecular  
58 markers facilitate the detection of coherent taxonomic units that can then be analyzed  
59 using various traits (e.g., internal morphology) and crosses. In asexual or self-fertilizing  
60 species, the latter criteria are of limited use. We studied a group of cryptic freshwater  
61 snails (genus *Galba*) from the family Lymnaeidae that have invaded almost all  
62 continents, reproducing mainly by self-fertilization and transmitting liver flukes to  
63 humans and livestock. We aim to clarify the systematics, distribution and phylogenetic  
64 relationships of these species with an integrative approach that includes morphology  
65 (shell and reproductive anatomy), molecular markers, wide-scale sampling across  
66 America, and data retrieved from GenBank (to include Old World samples). Our  
67 phylogenetic analysis suggests that the genus *Galba* originated ca. 22 Myr ago and  
68 today comprises six clusters of species. Four of these clusters (*G. truncatula*, *G.*  
69 *cubensis/viator*, *G. humilis* and *G. schirazensis*) are morphologically cryptic and  
70 constitute species or species complexes with wide variation in their genetic diversity,  
71 geographic distribution and invasiveness. The other two clusters constitute a single  
72 species or a species complex (*Galba cousini/meridensis*) that demonstrate more  
73 geographically restricted distributions and exhibit an alternative morphology more  
74 phylogenetically derived than the cryptic one. Further genetic studies are required to  
75 clarify the status of both *G. cousini/meridensis* and *G. cubensis/viator*. We emphasize  
76 that no *Galba* species should be identified without molecular markers and that  
77 additional sampling is required, especially in North America, Eurasia and Africa to  
78 clarify remaining questions in systematics and biogeography. We also discuss several

79 hypotheses that can explain crypsis in *Galba*, such as convergence and morphological  
80 stasis, and hypothesize a role for stabilizing selection in amphibious (rather than strictly  
81 freshwater) habitats.

## 82 **Introduction**

83 Cryptic species are groups of populations in which the intrapopulation phenotypic  
84 variance exceeds interspecific phenotypic variance (see review in Bickford et al., 2007;  
85 Fišer et al., 2018; Struck et al., 2018). They have been described in all taxonomic  
86 kingdoms, although cryptic species seem to be more often reported in animals (Struck et  
87 al. 2018). Their frequency might reach a bit less than 1% of all animal species, an  
88 estimate that should be considered quite approximate given our lack of knowledge on  
89 the species totals. They also seem to be homogeneously distributed among taxa and  
90 biogeographical regions (Pfenninger and Schwenk 2007), although it has been  
91 suggested that caves and subterranean habitats may promote cryptic speciation. Such  
92 isolated, dark, low-energy habitats promote diversification but constrain morphological  
93 differentiation since very specialized adaptations are needed to survive in them (Katz et  
94 al. 2018). Four hypotheses have been proposed for the origin of cryptic species (Fig. S1;  
95 Bickford et al., 2007; Fišer et al., 2018; Struck et al., 2018): (1) recent divergence, when  
96 distinguishing traits have not as yet accumulated (e.g. cave fish, Niemiller et al. 2012);  
97 (2) parallelism, where independent phenotypic traits evolve in different taxa from a  
98 similar and shared ancestral trait (Struck et al. 2018); (3) convergence, where more  
99 distantly related species evolve from dissimilar ancestors (e.g. sea stars, Zulliger and  
100 Lessios, 2010), and (4) morphological stasis, where species remain similar over long  
101 periods of time constrained by limited genetic variation or stabilizing selection (e.g.,  
102 Gomez et al., 2004; Struck et al., 2018).

103 Although interesting as models for study of the speciation process (Coyne and  
104 Orr 2004; De Queiroz 2007), cryptic species are problematic from two human  
105 perspectives: biological invasion and disease transmission. Cryptic species may exhibit  
106 wide differences in invasive ability and impact on invaded ecosystems and communities

107 (Fang et al. 2014). An accurate identification at the species level is required in such  
108 situations to track invasions and mitigate any harmful consequences (Kolar and Lodge  
109 2001; Dunn and Hatcher 2015; Jarić et al. 2019). Cryptic species may also exhibit  
110 differences in disease transmission. This is the case in the *Anopheles gambiae* complex  
111 which includes the most important vectors of malaria in Africa (Stevenson and Norris  
112 2016). Some members of the complex are broadly zoophilic, while others feed more  
113 strictly on humans. Accurate species identification is required for effective mosquito  
114 control.

115         Snails, especially freshwater ones, are an interesting group for addressing  
116 biogeographic issues in cryptic species. Although taxonomists have increasingly used  
117 molecular markers over the last decades to identify snail species (Dayrat et al. 2011),  
118 morphological characters, especially shell shape and sculpture, remain widely relied  
119 upon—often resulting in large numbers of synonymous species (Qian et al. 2012). The  
120 shells of some mollusk populations show significant phenotypic plasticity, however, in  
121 reaction to temperature, pollution or predation (Bourdeau et al. 2015). Others stay stable  
122 for millions of years (e.g., Weigand et al., 2011; Weiss et al., 2018). This has resulted  
123 both in the proliferation of species names and descriptions (e.g., Taylor, 2003), most of  
124 which are invalid (Jarne et al. 2010; Dillon et al. 2011), as well as the misidentification  
125 of valid species, yielding errors in the assessment of species invasion ability and  
126 distributional range (e.g., Pfenninger et al., 2006; Rama Rao et al., 2018). For example,  
127 an invasive Asian clam of the genus *Sinanodonta* has been overlooked in Russia  
128 because it is morphologically indistinguishable from another invasive Asian clam  
129 (Bespalaya et al. 2018). Such problems call for an integrated approach to gastropod  
130 systematics and biogeography in which phenotypic traits are studied together with  
131 appropriate molecular tools (Dayrat 2005).

132 Here we focus on small-bodied basommatophoran pulmonate snails of the genus  
133 *Galba* (Hydrophila, Lymnaeidae), common inhabitants of unstable freshwater habitats  
134 worldwide. Baker (1911) recognized 30 species and subspecies in the subgenera *Galba*  
135 (*s.s.*) and *Simpsonia* in North America, on the basis of minor shell morphological  
136 variation, where Hubendick (1951) suggested that as few as four biological species  
137 might be valid: *humilis*, *truncatula*, *cubensis* and *bulimoides*. The more recent work of  
138 Burch (1982) proposed 22 North American species in the genus *Fossaria*, which we  
139 here consider a junior synonym of *Galba*. In South America, Hubendick (1951)  
140 recognized only two species of small-bodied, amphibious lymnaeids (*viator* and  
141 *cousini*), but more recent work based on molecular approaches distinguishes seven  
142 species (*viator*, *schirazensis*, *cousini*, *neotropica*, *meridensis*, *truncatula* and *cubensis*;  
143 (Bargues et al. 2007, 2011b, 2011a; Correa et al. 2010, 2011; Lounnas et al. 2017,  
144 2018).

145 Despite an estimated divergence time on the order of 20 Myr based on genomic  
146 data (Burgarella et al. 2015), most of the nominal species of *Galba* share a similar shell  
147 morphology and internal anatomy, as well as common levels of phenotypic plasticity in  
148 shell, anatomy, and life history (Samadi et al. 2000; Correa et al. 2011). The exceptions  
149 are *Galba cousini* (Paraense 1995) and *Galba meridensis* (Bargues et al. 2011b), which  
150 are mutually similar but morphologically distinctive. These two groups are cryptic  
151 species; they are often misidentified and often confused (Correa et al. 2010; Bargues et  
152 al. 2011a).

153 A further challenge is that crossing cannot be used to distinguish species (Coyne  
154 and Orr 2004), as has been done in other freshwater snails (e.g., *Physa* species, Dillon et  
155 al., 2011), since *Galba* populations primarily reproduce by self-fertilization (Meunier et  
156 al. 2004; Bargues et al. 2011a; Lounnas et al. 2017, 2018). Moreover, at least two



157 species, *G. schirazensis* and *G. truncatula*, have been shown to be extremely efficient  
158 anthropogenic invaders, muddling our knowledge of species distribution. Populations of  
159 *G. truncatula*, probably from Eurasia, have invaded South America, especially the  
160 Bolivian Altiplano (Meunier et al. 2004). This is of special concern since *Galba*  
161 populations are the main vectors of the liver fluke *Fasciola hepatica* which causes  
162 fasciolosis in both livestock and humans (Mas-Coma et al. 2005) and transmission  
163 efficiency and invasion ability differ among species (Vázquez et al. 2018).

164       Worldwide, the geographic distribution of *Galba* species is poorly known. The  
165 dubious character of records based on morphological identification leaves us with a  
166 small sample of molecular studies (Correa et al. 2010, 2011; Bargues et al. 2011b,  
167 2011a, 2012; Lounnas et al. 2017, 2018) upon which to base a very large-scale  
168 phenomenon. So, our objectives here are to characterize the geographic distribution of  
169 *Galba* species at continental scale, based on an extensive sampling over America, to  
170 reconstruct the genus phylogeny to delimit species, and to explore the origin of crypsis.  
171 We aim to delineate species—the real scientific challenge of integrative taxonomy  
172 (Dayrat 2005)—noting that in practice *Galba* species are very difficult to delineate due  
173 to its crypsis, wide geographical distribution, and mating system. Previous studies  
174 reconstructing *Galba* phylogeny have used single genes and analyzed fewer than 10  
175 sequences per species, failing to account for the wide geographic distribution of this  
176 genus (Correa et al. 2010, 2011; Bargues et al. 2011c, 2011a; Standley et al. 2013).  
177 Here we employ morphological and molecular markers (microsatellite loci and DNA  
178 sequences from two genes) to study more than 1,700 individual *Galba* from 161 sites.  
179 Our data set was augmented with a complete sample of all the *Galba* DNA sequences  
180 available in GenBank and multiple phylogenetic analyses conducted. We used both  
181 gene trees and multispecies coalescent models to shed light on the phylogenetic

182 relationships and on the origin of crypsis in the genus *Galba*.

183

## 184 **Materials and methods**

### 185 **Snail sampling and species identification**

186 We conducted simple searches for *Galba* populations in suitable habitats throughout the  
187 New World over a span of two decades, 1998–2017. Overall, *Galba* populations were  
188 detected in 161 sites and 1,722 individuals were sampled from nine countries:  
189 Argentina, Canada, Colombia, Cuba, Ecuador, France (French Guiana, Guadeloupe and  
190 Martinique), Peru, Venezuela, and USA (Table S1). *Galba* populations have previously  
191 been reported from some of these sites in Venezuela and Ecuador by the authors  
192 (Pointier 2015; Orlando Narváez et al. 2017).

193 In most cases, we discovered our *Galba* populations in unstable habitats subject  
194 to frequent flooding and droughts. The sampled habitats were characterized as brook,  
195 irrigation canal, ditch, oxbow lake, pond, marsh, lake, tank, rice field, and river.  
196 Individual snails were often collected above the water line, consistent with their  
197 amphibious habit. Some sites were visited up to five times. Geographic coordinates  
198 were recorded for most sites.

199 After collection, individuals were placed in water at 70 °C for 30–45 s. This  
200 procedure allows fixation of individuals without contraction of soft parts and facilitates  
201 a proper study of snail internal anatomy. The body was carefully withdrawn from the  
202 shell using forceps and both body and shell stored in 70% ethanol until morphological  
203 and DNA analyses (Pointier et al. 2004).

204 Species were characterized using a three-step procedure involving both  
205 morphological and molecular markers (Fig. 1). Step 1 was an analysis of shell  
206 morphology and reproductive anatomy. In step 2, we used a molecular tool that enables

207 us to distinguish *G. cubensis*, *G. schirazensis*, and *G. truncatula* (Alda et al. 2018). In  
208 step 3, we sequenced mitochondrial and nuclear genes in individuals for which no PCR  
209 amplification product was obtained in step 2. DNA from some of those individuals  
210 identified in steps 1 and 2 were also sequenced in order to reconstruct the phylogeny of  
211 *Galba*. Note that this three-step approach is less expensive than an approach based on  
212 simply sequencing the same genes in all individuals.

213

#### 214 *Step 1: morphology of the shell and of internal organs*

215 We photographed the shell of three to five adult snails from each site and dissected their  
216 body under a stereoscopic microscope. We drew the anatomy of the penial complex,  
217 prostate, and renal tube using a camera lucida attachment (Pointier et al. 2004). We did  
218 not record any morphological measurements or perform any quantitative tests because  
219 Correa et al. (2011) have shown that cryptic *Galba* species cannot be delimited by such  
220 means. Our observations were qualitative only (Fig S2).

221

#### 222 *Step 2: multiplex PCR of microsatellite loci*

223 We applied the multiplex PCR test designed by Alda et al. (2018) to all the 1,420  
224 individuals that were not distinguishable based on shell and reproductive anatomy. This  
225 method is based on species-specific primers amplifying three microsatellite loci (one  
226 each per targeted species) and producing band sizes that are specific to these species  
227 (179–200 pb in *G. cubensis*, 227–232 pb in *G. schirazensis* and 111–129 pb in *G.*  
228 *truncatula*). DNA was extracted using a Chelex protocol following Estoup and Martin  
229 (1996) as adapted for 96-well plates. Methods for DNA amplification and  
230 electrophoretic resolution followed Alda et al. (2018).

231

232 *Step 3: identification by sequencing*

233 We amplified the internal transcribed spacer 2 (ITS2) and the cytochrome oxidase  
234 subunit 1 (COI) genes in 35 individuals sampled from 15 sites in Argentina, Canada and  
235 the USA (1 to 5 per population) where at least some individuals did not demonstrate an  
236 amplification product in step 1, using the method of Lounnas et al. (2017, 2018). We  
237 also amplified ITS2 and COI in 112 individuals that did return an amplification product  
238 in step 1, including one individual identified as *G. cousini/meridensis*. To supplement  
239 these results, we also amplified the internal transcribed spacer 1 (ITS1) and the ARN  
240 ribosomal 16S in two individuals of *G. cubensis* from Bosque del Apache (USA) and in  
241 one individual of *G. cousini/meridensis* from Ecuador (Table S1). With this approach,  
242 we obtained at least one sequence from each hypothetical species represented by the  
243 four genes and used them to delimit species. The total number of individuals amplified  
244 was 151.

245 We used the primers NEWS2 (forward) 5' TGTGTCGATGAAGAACGCAG 3'  
246 and ITS2-RIXO (reverse) 5' TTCTATGCTTAAATTCAGGGG 3' to amplify ITS2;  
247 Lim1657 (forward) 5' CTGCCCTTTGTACACACCG 3' and ITS1-RIXO 5'  
248 TGGCTGCGTTCTTCATCG 3' to amplify ITS1 (Almeyda-Artigas et al. 2000);  
249 LCOI490 (forward) 5' GGTCAACAAATCATAAAGATATTGG 3' and HCO2198  
250 (reverse) 5' TAAACTTCAGGGTGACCAAAAAATCA 3' to amplify COI (Folmer et  
251 al. 1994) and forward 5' CGCCTGTTTATCAAAAACAT 3' and reverse 5'  
252 CCGGTCTGAACTCAGATCACGT 3' to amplify 16S (Remigio and Blair 1997). In all  
253 cases, PCR amplification was performed in a total volume of 25 µl containing 12.5 µl of  
254 Taq PCR Master Mix (Qiagen), 2.5 µl of each primer (10 mM) and 2 µl of DNA in an  
255 Eppendorf Thermal Cycler with an initial denaturation step at 95 °C for 15 minutes;  
256 followed by 35 cycles of denaturation at 95 °C for 30 seconds, annealing at 50 °C for

257 one minute, extension at 72 °C for one minute; and a final elongation at 60 °C for 30  
258 minutes. The presence and size of amplification products were electrophoretically  
259 confirmed in 1% agarose gels stained with EZ-Vision. DNA sequencing was performed  
260 by Eurofins Genomics (Ebersberg, Germany) using PCR-amplified products as  
261 templates. All sequences were uploaded to GenBank (Table S1) and assigned to a  
262 species using the phylogenetic reconstruction.

263

#### 264 **Type localities**

265 Because of the longstanding confusion and uncertainty regarding the systematics of the  
266 genus *Galba* worldwide, it is especially important to establish standard populations,  
267 against which unknown populations can be compared. Type localities were specified by  
268 the authors of all the more recently-described species, such as *neotropica* (Bargues et al.  
269 2007) and *meridensis* (Bargues et al. 2011b), and others have been established by  
270 subsequent use, for example *schirazensis* (Bargues et al. 2011a). But in his original  
271 description of *Limnaeus viator*, D’Orbigny (1835) simply stated “Patagonia.” And  
272 Pfeiffer (1839) gave no locality data for his *Limnaeus cubensis* at all, beyond “Cuba”.  
273 In such circumstances, the ICZN code provides that subsequent authors may restrict  
274 type localities to some more precise spot “within the known range of the taxon”. Type  
275 localities for all eight of the widely-recognized species in the genus *Galba*, either as  
276 originally stated or as subsequently restricted, are listed in Table 1. COI sequences from  
277 samples of all the populations inhabiting these localities have been previously uploaded  
278 to GenBank, and most have ITS1, ITS2 or 16S sequences available as well.

279

#### 280 **Retrieving data on *Galba* spp. distribution from published work**

281 We searched the literature and GenBank for sequence data at four genes (COI, ITS1,

282 ITS2, and 16S) apparently attributable to lymnaeids of the genus *Galba*. Coordinates  
283 were provided for most sites by the authors. When coordinates were not provided, we  
284 inferred them from the locality data using GoogleEarth. We found 132 New World sites  
285 in which *Galba* species have been molecularly characterized (Table S2), and 45 sites in  
286 the Old World (Table S3, Fig S3). The specific nomina attributed to these sequences by  
287 their depositors in GenBank were 157 *truncatula*, 152 *schirazensis*, 70 *neotropica*, 57  
288 *cubensis*, 44 *viator*, 20 *cousini*, 9 *humilis*, 6 *meridensis*, and 2 others. This corresponds  
289 to 166 COI, 163 ITS2, 118 ITS1, and 70 16S sequences.

290

### 291 **Phylogenetic and ancestral reconstruction study**

292 Phylogenetic analyses were conducted on the ITS2 and COI sequences obtained in this  
293 study, together with ITS2, COI, ITS1, and 16S sequences retrieved from GenBank.  
294 Most of these sequences have been previously published (Tables S2–S3). Ultimately,  
295 we included 796 sequences in our analyses: 90 for 16S, 251 for COI, 122 for ITS1, and  
296 333 for ITS2. Some GenBank accession numbers appear more than once in Tables S2–  
297 S3 because individuals with identical sequences have been registered under the same  
298 GenBank accession number.

299 Alignment was performed individually for each gene using MAFFT (Katoh and  
300 Standley 2013). Ambiguously aligned sites were excluded using GBLOCKS with  
301 default settings for a less stringent selection (Castresana 2000). The number of positions  
302 in the final sequences was 412 for 16S (83% of the original 493 positions), 609 for COI  
303 (86% of 707), 435 for ITS1 (48% of 888), and 333 for ITS2 (23% of 1,429). We  
304 examined levels of saturation for each gene and for the first and second *versus* third  
305 codon positions of COI using DAMBE (Xia 2017). We did not find evidence of  
306 saturation in the four genes analyzed, including all codon positions of COI. We

307 partitioned codon positions and unlinked substitution models in phylogenetic analyses.

308 We used Bayesian inference in Beast2 (Bouckaert et al. 2014) for five reasons:

309 (1) to assign sequences to species; (2) to validate, and to mend if necessary, species  
310 identity for sequences retrieved from GenBank; (3) to delimit species; (4) to reconstruct  
311 the phylogeny and estimate time divergence; and (5) to assess the ancestral phenotypic  
312 state of *Galba* species. Because we did not have identical sets of individuals (or

313 populations) across genes it was necessary to build four unlinked gene trees to address  
314 questions (1) and (2). The best-fitting models of sequence evolution for each gene were  
315 selected using bModelTest (Bouckaert and Drummond 2017). We estimated a model for  
316 each COI partition (1<sup>st</sup>, 2<sup>nd</sup>, and 3<sup>rd</sup> position). The best model describing the evolution of  
317 16S was HKY+G+I, 123424+G+I for COI (1<sup>st</sup> codon), 121321+G+I for COI (2<sup>nd</sup>  
318 codon), TN93+G+I for COI (3<sup>rd</sup> codon), 123424+G+I for ITS1, and 121323 for ITS2.

319 We linked trees for the three COI codon partitions. The analyses were run using four  
320 gamma categories and a proportion of 0.5 invariant sites. Uncorrelated relaxed-clock  
321 models were chosen for all loci. The relative clock mean priors were all lognormal (M =  
322 0, S = 1). We used a birth-death model as priors with lognormal birth and death rates.

323 These gene trees allowed us to evaluate species names and validate or mend species  
324 identity for all sequences, whether obtained in this study or retrieved from GenBank.

325 All the MCMC were run for 200,000,000 generations storing every 20,000 generations.

326 The names of the eight widely-recognized species in the genus *Galba* were ultimately  
327 assigned by reference to their type localities. Since gene trees can be erroneously

328 inferred due to incomplete sampling, incomplete lineage sorting or introgression

329 between lineages, we also built haplotype networks for each gene using popART (Leigh  
330 and Bryant 2015) and compared them with gene trees.

331 To address our question (3), species delimitation, we built ten multispecies  
332 coalescent tree models in StarBeast2 (Ogilvie et al. 2017) differing in species  
333 assignments, some models splitting species to as many as nine while others lumping to  
334 as few as five. We assigned the species identity obtained from tasks 1 and 2 to each  
335 individual and tested each scenario in turn. We also created an eleventh model in which  
336 we separated the populations of *G. viator* from Argentina and from Chile to test whether  
337 splitter models showed higher support than lumping models regardless of their biological  
338 meaning. Since all the hypothetical species generated in these tree models must be  
339 represented by all genes, we removed the sequences from Ethiopia in this analysis.

340 In all our multispecies coalescent tree models, we used the same site models as  
341 for reconstructing the gene trees. We assigned to the mitochondrial loci a gene ploidy of  
342 0.5 and to nuclear loci a gene ploidy of 2.0 (diploid). We used constant population sizes  
343 (fixed to 1) and uncorrelated relaxed-clock models for all loci. For nuclear loci, we used  
344 the molecular clock rate reported by Coleman and Vacquier (2002) for ITS in bivalves  
345 (0.00255 per Myr). For mitochondrial loci, we retained the molecular clock rate  
346 estimated by Wilke et al. (2009) for COI in invertebrates (0.0157 per Myr). We used the  
347 birth-death model as tree prior with lognormal birth and death rates. We ran each model  
348 using Multi-Threaded Nested Sampling analysis with 10 particles, 8 threads, a chain  
349 length of 100,000,000 and sub-chain length of 5,000. Then, we compared the trees by  
350 computing Bayes factor (BF), a model selection tool that is simple and well-suited for  
351 comparing species-delimitation models (Leaché et al. 2014). BF is the difference  
352 between the marginal likelihoods of two models:  $BF = \text{model 1} - \text{model 2}$ . If BF is  
353 larger than 1, model 1 is favored, and otherwise model 2 is favored. When BF is  
354 between 20 and 150 the support strong and when the BF is above 150 the support is  
355 overwhelming (Leaché et al. 2014). We used Nested Sampling implemented in the NS



356 package to calculate the marginal likelihoods necessary to obtain BF and also an  
357 estimate of the variance of the marginal likelihoods (Russel et al. 2019).

358 We also applied two other species-delimitation methods: Automatic Barcode  
359 Gap Detection (ABGD; Puillandre et al. 2012) and Species Tree and Classification  
360 Estimation in Beast2 (STACEY, Jones 2017). ABGD was run for each gene using the  
361 default settings (<https://bioinfo.mnhn.fr/abi/public/abgd/>). The prior on intraspecific  
362 divergence defines the threshold between intra- and interspecific pairwise distances and  
363 is iterated from minimum to maximum through ten steps (Puillandre et al. 2012). Given  
364 the wide genetic diversity observed within some species (Lounnas et al. 2017), we  
365 chose the partition that showed high prior on intraspecific divergence (the penultimate  
366 partition).

367 For the STACEY delimitation method, we used only the ITS2 and COI  
368 sequences because these both genes were better represented in the dataset than ITS1 and  
369 16S. Since the hypothetical number of species in STACEY ranges from one to the  
370 number of individuals, each of our 113 snail populations was considered as a minimal  
371 cluster. The method distinguishes very shallow species divergences with a statistic  
372 called “collapseHeight,” which we set to a small value (0.0001) following Jones (2017).  
373 Given the results obtained with ABGD and Nested Sampling analyses, we ran three  
374 multispecies coalescence models with different collapseWeight parameters: (1) a  
375 lumping model with five *Galba* species with 1/X distribution (initial value: 0.975,  
376 between 0 and 1), (2) a splitting model with nine species with 1/X distribution (initial  
377 value: 0.952 between 0 and 1), and (3) a no-prior-taxonomic model with a Beta  
378 distribution ( $\alpha = 2$ ,  $\beta = 2$ ). The initial value of the lumping and splitting models were  
379 calculated following Matos-Maravi et al. (2018). All other parameters were set as in the

380 Nested Sampling analysis. We ran the three models for 250,000,000 generations with  
381 storing every 25,000 generations.

382 To address our question (4), regarding species topology and divergence time, we  
383 reran the multispecies tree model that showed the highest Bayes Factor in StarBeast2.  
384 We used the same parameters as in the Nested Sampling analysis, but we ran the  
385 MCMC for a longer time (250,000,000 generations stored every 25,000 generations).  
386 The MCMC output was visualized using Tracer (Rambaut et al. 2018) and tree samples  
387 summarized by TreeAnnotator (utility program distributed with the Beast package)  
388 using a 10% burn-in. The species tree was visualized and edited in FigTree, GIMP  
389 (<https://www.gimp.org>), and DensiTree (Bouckaert and Heled 2014). Some analyses  
390 were run in CIPRES Science Gateway (Miller et al. 2012). Note that we did not add an  
391 outgroup to root trees because *Galba* monophyly has already been ascertained (Correa  
392 et al. 2010, 2011).

393 Finally, to address our question (5), the ancestral phenotypic state, we applied  
394 Bayesian Binary MCMC (BBM, Ronquist and Huelsenbeck 2003), statistical dispersal-  
395 vicariance analysis (S-DIVA; Yu et al. 2010), and Statistical dispersal-extinction-  
396 cladogenesis (S-DEC; Ree and Smith 2008) in the software Reconstruct Ancestral State  
397 in Phylogenies (RASP, Yu et al. 2015). We used the splitting model (scenario A) under  
398 default settings. We added two phenotypic states: one for all cryptic species and another  
399 one for *G. cousini/meridensis*.

400

## 401 **Results**

### 402 **Morphology**

403 Most individuals (N = 1,420 from 133 sites) were not distinguishable based on shell and  
404 reproductive anatomy (Fig. S4). The exception was a single group comprising all

405 individuals from *G. cousini* and *G. meridensis* (N = 302). These tended to demonstrate  
406 more globose shells with shorter spires, adult sizes in excess of 10 mm standard shell  
407 length. *Galba cousini* and *G. meridensis* also differed from the other species in their  
408 internal anatomy—a ureter with two distinct flexures, a wider and more ovate prostate,  
409 a larger penial complex, and a penis sheath approximately the same length as the  
410 preputium (Fig. S4). We did not find any anatomical differences between *G. cousini* and  
411 *G. meridensis*, however, comparing individuals from Ecuador, Colombia, and  
412 Venezuela.

413

#### 414 **Multiplex PCR of microsatellite loci**

415 DNA from the 1,420 American individuals with similar phenotypes was amplified using  
416 the multiplex PCR procedure (step 2 from Fig. 1). We identified 541 individuals of *G.*  
417 *cubensis*, 330 of *G. schirazensis*, and 349 of *G. truncatula* (Table S1). No amplification  
418 was observed in 200 individuals sampled in one site from Argentina and 14 sites from  
419 Canada and USA (Table S1).

420

#### 421 **Identification by sequencing**

422 Phylogenetic analysis of COI sequences returned six clusters (Fig. S5). Clusters I–V  
423 each contained a single type population: *truncatula* (I), *schirazensis* (II), *humilis* (III),  
424 *cousini* (IV), and *meridensis* (V). Cluster VI contained the type populations of *cubensis*,  
425 *neotropica*, and *viator*. The posterior probabilities (PP) of all clusters were 1.0, except  
426 for cluster III (*humilis*, PP = 0.95).

427 Analysis of 16S, ITS1, and ITS2 sequences confirmed the COI results in almost  
428 all respects, although sequences were missing for at least one or two type populations in  
429 each tree (Figs. S6–S8). However, we detected discrepancies between the mitochondrial

430 and nuclear gene trees. A striking example are sequences from Bosque del Apache  
431 (USA; cluster VI) that exhibited very long branches in the mitochondrial gene trees  
432 (Figs. S5–S6) but clustered tightly with the *cubensis* type population and similar  
433 populations in the nuclear gene trees (Figs. S7–S8). The mitochondrial sequences from  
434 Ethiopia (one per gene) also formed a long branch, although nuclear sequences were not  
435 reported in GenBank for that population. Within cluster VI, we found that the *cubensis*  
436 and *neotropica* type populations were located in separate subclades for the nuclear  
437 genes but clustered together in the mitochondrial trees (Figs. S5–S8).

438 Gene trees (Figs. S5–S8) and haplotype networks (Figs. S9–S12) showed that  
439 genetic diversity varied among the six clusters and four genes. Cluster II (*schirazensis*)  
440 showed reduced variation, while cluster VI (*cubensis*, *neotropica*, and *viator*) was larger  
441 and more diverse. Mitochondrial genes seemed more diverse than nuclear genes. This  
442 observation may be biased, however, by a structural correlation in our data between  
443 genes sequenced and regions sampled.

444 Most of the sequences uploaded to GenBank identified as one of the eight  
445 species of *Galba* were accurately clustered into the six clades containing their type  
446 populations. However, there were some exceptions. Eight sequences of COI uploaded  
447 as *G. truncatula* from France appeared in cluster II with the *G. schirazensis* type  
448 population (Table S3; Fig. S5). We reidentified these sequences as belonging to *G.*  
449 *schirazensis*. The COI sequence from Ethiopia, uploaded as *G. truncatula*, clustered at  
450 the base of *truncatula* clade I with low posterior probability (Fig. S5). The other  
451 Ethiopian sequence (16S), also identified as *G. truncatula*, did not cluster with any of  
452 the *Galba* clades (Fig. S6).

453

454 **Species delimitation**

455 Figure 3 illustrates the results obtained using the three species-delimitation methods.  
456 The Multi-Threaded Nested Sampling analysis (Fig. S13) suggested that scenario A  
457 (nine species) is the best fit to the available data, demonstrating the largest maximum  
458 likelihood estimate (Fig. 3; see Table S4 for Likelihoods). BF analysis preferred  
459 scenario A over scenario D (current taxonomy) or scenario K, separating populations of  
460 *G. viator* from Argentina and from Chile. This suggests that further splitting the  
461 phylogeny of *Galba* (here to consider that *G. meridensis* and *G. cousini* are separate  
462 species) is not required.

463 ABGD results varied depending on the gene analyzed (Fig. 3). Nine species  
464 (scenario A) were suggested by ITS1, while six species only were returned by our  
465 analysis of ITS2 and 16S, with *G. cubensis*, *G. viator*, *G. neotropica*, and *Galba* sp.  
466 “Bosque del Apache” lumped. ABGD analysis of the COI gene indicated that *G. viator*  
467 and *Galba* sp. “Bosque del Apache” are separate species, but that *G. cubensis* and *G.*  
468 *neotropica* should be lumped together. The ITS2 and COI analyses also suggested that  
469 some species (*G. cousini* and *G. truncatula*) might be represented by more than one  
470 taxon.

471 The species-delimitation analysis implemented in STACEY suggested that six of  
472 the nine clusters of scenario A might include more than one taxon. The exceptions were  
473 *G. viator*, *G. meridensis*, and *Galba* sp. “Bosque del Apache,” the last two species  
474 including only one population. Our STACEY results converged towards similar  
475 MCMCs regardless of which prior was used for the collapseWeight parameter (Fig. 3).

476

#### 477 **Phylogeny, time of divergence, and state reconstruction**

478 Clusters III (*humilis*), IV (*cousini*), and V (*meridensis*) were grouped together in all  
479 gene trees returned by our analysis. But inconsistent results among genes were obtained

480 for the remainder of the other clusters identified (Figs. S5–S8). The multilocus  
481 multispecies tree returned three major groups: cluster I (*truncatula*) together with II  
482 (*schirazensis*); cluster III (*humilis*) together with IV (*cousini*) and V (*meridensis*); and  
483 the cluster VI group (*viator/cubensis/neotropica/sp.* “Bosque del Apache”). All groups  
484 showed posterior probabilities of 1.0 except for the first one (0.44; Fig. 4). The  
485 multilocus multispecies tree visualized in DensiTree (Fig. 3) confirmed that most tree  
486 topologies united the clusters into the three major groups outlined above, although some  
487 topologies placed clusters differently reflecting the incongruence found among the gene  
488 trees.

489 The estimated divergence time from the most recent common ancestor of the  
490 *Galba* group was 22.6 Mya [95% HPD interval: 14.6–33; Figs. 3–4]. Diversification  
491 within the *G. cousini/meridensis* species complex and the *G. cubensis/viator* species  
492 complex seems to have occurred 5 Mya ago, or less. The three phenotypic state  
493 reconstruction analyses (S-DEC, S-DIVA, and BBM) suggested that the most recent  
494 common ancestor of *Galba* species displayed the cryptic phenotype (Fig. 4). Thus, the  
495 phenotype of *G. cousini* and *G. meridensis* should be considered as derived from the  
496 cryptic phenotype.

497

## 498 **Discussion**

### 499 ***Galba* comprises six clusters**

500 Here we report the largest study published to date of *Galba* systematics and distribution,  
501 based on extensive sampling at a very large geographical scale and integration of  
502 phenotypic and molecular approaches across all DNA sequences available in GenBank  
503 for four genes (Dayrat 2005). The widespread occurrence of self-fertilization in these  
504 populations voids the biological species concept (Coyne and Orr 2004), and the absence

505 of any reliable morphological distinction obviates the typological one, with the  
506 exception of *G. cousini/meridensis*. Thus, we are left with a phylogenetic approach,  
507 which suggests the existence of six clusters, perhaps corresponding to as many as eight  
508 species, or as few as five. These findings reinforce several previously-published works  
509 that have involved fewer genes and smaller sample sizes (Correa et al. 2010, 2011;  
510 BARGUES et al. 2011b, 2011a; Standley et al. 2013; Lounnas et al. 2017).

511 We suggest that three of our clusters are best understood as one species each.  
512 The oldest taxonomic names for these are *Galba truncatula* (Müller 1774) for cluster I,  
513 *Galba schirazensis* (Küster 1862) for cluster II, and *Galba humilis* (Say 1822) for  
514 cluster III. The other three clusters (IV to VI) may in fact correspond to just two highly-  
515 diverse species or species complexes.

516 Cluster IV (*Galba cousini* Jousseume 1887) and cluster V (*Galba meridensis*  
517 BARGUES, Artigas, Khoubbane & Mas-Coma 2011) may be united into a single species  
518 complex, with *cousini* the oldest name. All these populations inhabit northern regions of  
519 South America, and together they exhibit a single phenotype not shared by other  
520 populations of *Galba*. They always clustered together in our phylogenetic  
521 reconstructions, with a divergence time of 4.7 Mya. However, *G. meridensis* has been  
522 sampled in but a single locality, and more extensive sampling is required to ascertain  
523 whether these are two species or a single species complex.

524 Cluster VI, including the nomina *Galba viator* (d'Orbigny 1835), *Galba*  
525 *cubensis* (Pfeiffer 1839), *Galba neotropica* (BARGUES, Artigas, Mera y Sierra, Pointier &  
526 Mas-Coma, 2007), and a population from southern USA (Bosque del Apache) seem to  
527 comprise *Galba* species number five. The distance separating *G. cubensis* and *G.*  
528 *neotropica* is limited (1 Mya). Moreover, microsatellite markers defined in *G. cubensis*  
529 amplified effectively in individuals of *G. neotropica* (Lounnas et al. 2017), suggesting a

530 very short genetic distance. We therefore suggest synonymy of these two species under  
531 the name *G. cubensis*. *Galba viator* and *G. cubensis* have overlapping distributions in  
532 Argentina, Chile, and Uruguay (Artigas et al. 2011; Sanabria et al. 2013; Standley et al.  
533 2013; Medeiros et al. 2014), and additional sampling in this region would help resolve  
534 their genetic relationships. Here any distinction between the two sets of populations  
535 depends on both the genes and phylogenetic methodology employed. The population  
536 from Bosque del Apache (USA) was also included in cluster VI, depending on the gene  
537 analyzed. Its long mitochondrial branch may suggest rapid evolution, and here again  
538 more extensive sampling is required before reaching any conclusions. On the whole, a  
539 cautious position would be to suggest that cluster VI corresponds to a species complex  
540 or a species with wide diversity, as has been found in other freshwater snails from the  
541 clade Hygrophila (e.g., Ebbs et al., 2018; Mavárez et al., 2002; Pfenninger et al., 2006).  
542 We also note that if we ultimately recognize a single species; its name should be *viator*,  
543 and not *cubensis*, based on prior description.

544         The *Galba* species tree that we constructed based on a multispecies coalescent  
545 model returned three groups: one group uniting *G. truncatula* and *G. schirazensis*,  
546 another uniting *G. humilis* and *G. cousini/meridensis* and the last with *G.*  
547 *cubensis/viator*. This result partially agrees with some gene trees published in previous  
548 work (Correa et al. 2010, 2011; BARGUES et al. 2011a). However, previous trees were  
549 based on single genes and smaller sample sizes. Our phylogenetic analysis also revealed  
550 some distinctive branches, including the mtDNA sequences from Ethiopia (Dayrat et al.  
551 2011) and the samples from Bosque del Apache. These results may suggest undetected  
552 species or accelerated molecular evolution (Fourdrilis et al., 2016; Pinceel et al., 2005;  
553 Thomaz et al., 1996).



554 In North America, Burch (1982) recognized 22 species of small, mud-dwelling  
555 lymnaeids, which he grouped into the genus *Fossaria* with two subgenera, *Fossaria*  
556 (*s.s.*) with 11 species and *Bakerilymnaea* with 11 (see Table S5 for species names).  
557 Johnson et al. (2013) transferred these species to the genus *Galba*, but otherwise  
558 retained the Burch system. Included in the present analysis were topotypic samples of  
559 *obrussa* from Philadelphia and *parva* from Cincinnati, both of which we here show to  
560 be indistinguishable from topotypic *humilis*, collected at Owego, New York. Remigio  
561 (2002) contributed to Genbank a 16S sequence from a Canadian population he  
562 identified as *Fossaria obrussa*, also grouping with cluster III (*humilis*). We suggest that  
563 *obrussa*, *parva*, and the seven other uniquely North American specific nomina listed  
564 above ascribed by Burch (1982) to the subgenus *Fossaria* are junior synonyms of *G.*  
565 *humilis*, setting aside American populations of *G. truncatula* as distinct. In addition to  
566 his *obrussa* sequence, Remigio (2002) contributed a 16S sequence from Oklahoma to  
567 Genbank which he labelled “*Fossaria bulimoides*”. This sequence grouped with cluster  
568 VI (*cubensis/viator*) in our analysis. We suggest that all 12 specific nomina ascribed by  
569 Burch (1982) to the *Fossaria* subgenus *Bakerilymnaea* (Table S5) including *bulimoides*  
570 (Lea 1841), are junior synonyms of *G. cubensis/viator*.

571

### 572 **A set of cryptic species**

573 Our study has confirmed the previous reports of Samadi et al. (2000) and Correa et al.  
574 (2011) that most species of *Galba* cannot be distinguished on the basis of shell  
575 morphology or internal anatomy. Trait variability within species seems to be greater  
576 than variance among species, likely attributable to phenotypic plasticity (Correa et al.  
577 2011). Reproductive and growth traits in *G. truncatula* have been shown to vary  
578 according to habitat characteristics at small geographical scales (Chapuis et al. 2007),

579 suggesting both that life-history traits are phenotypically plastic, and that to rely on such  
580 traits for specific identification is not advisable.

581 Our study also confirms that *G. cousini/meridensis* differs strikingly in adult  
582 size, shell shape, and anatomy from all other *Galba* species. Our molecular evidence  
583 suggests that *G. cousini/meridensis* evolved from a *Galba* ancestor demonstrating the  
584 cryptic phenotype. Interestingly, *G. cousini/meridensis* is the largest species within the  
585 genus *Galba*, occurs in a specialized habitat and displays the complex reproductive  
586 anatomy of an outcrossing species (see Jarne et al. 2010; Escobar et al. 2011).

587 Among the freshwater pulmonates, crypsis has previously been documented in  
588 *Ancylus* (Weiss et al. 2018) and *Radix* (Pfenninger et al. 2006). Our methods here were  
589 strictly qualitative, as was the case for *Ancylus* and *Radix*, because previous studies  
590 (Samadi et al. 2000; Correa et al. 2011) have shown that the dimensions of internal  
591 organs depend on physiological state and hence that species cannot be distinguished by  
592 means of such measurements. Future, more comprehensive approaches should include  
593 other more discrete anatomical traits, such as radular morphology.

594 Four hypotheses have been offered to explain the occurrence of cryptic species:  
595 recent divergence, parallelism, convergence, and stasis (Fig S1, Bickford et al. 2007;  
596 Fišer et al. 2018; Struck et al. 2018). The recent divergence hypothesis seems unlikely  
597 in this case. *Galba* has no closely related groups; its closest relatives are probably the  
598 stagnicoline lymnaeids of North America and Eurasia, which demonstrate a very  
599 distinctive morphology (Correa et al. 2010). Our analyses suggest that the several  
600 species of *Galba* are separated by more than 20 Myr (Burgarella et al. 2015). And  
601 indeed, the morphological divergence demonstrated by *G. cousini/meridensis* suggests  
602 that time is not been a significant constraint. The parallelism hypothesis also seems  
603 unlikely given that, based on our phylogenetic reconstruction, the cryptic morphology is

604 ancestral for *Galba*, and the only other morphology that has evolved in the group, as  
605 demonstrated by *G. cousini/meridensis*, is derived. Nor does the topology of lymnaeid  
606 phylogeny fit the convergence hypothesis (Correa et al. 2010). So, by default,  
607 morphological stasis is left as the most likely hypothesis to explain crypsis in the genus  
608 *Galba*, as has been proposed in other gastropod groups (e.g., Gomez et al., 2004; Struck  
609 et al., 2018).

610 Strong stabilizing selection related to specialized environmental conditions is  
611 one possible explanation for the morphological stasis demonstrated by our several  
612 species of *Galba*. Populations have colonized habitats that are not exploited by other  
613 freshwater snails, especially the transiently inundated margins of water bodies exposed  
614 during the dry season(s) (see Table S1). In other words, *Galba* populations are more  
615 amphibious than other freshwater snails, which might mitigate both predation and  
616 interspecific competition (Burgarella et al. 2015). Adaptation to such habitats might  
617 impose strong stabilizing selection for a shell morphology able to resist desiccation and  
618 concomitant morphological stasis.

619 Among the many adaptations that have been correlated with life in transitory  
620 environments such as the exposed margins of water bodies is the evolution of self-  
621 fertilization (Escobar et al. 2011; Burgarella et al. 2015). The stasis in reproductive  
622 anatomy we have documented in populations of *Galba* may simply reflect a shared  
623 adaption to self-fertilization in unpredictable habitat patches (Jarne et al. 2010). Once  
624 established, self-fertilization promotes the rapid erosion of genetic variation, as inbred  
625 populations become progressively unable to generate new genetic combinations through  
626 recombination (Noël et al. 2017). Thus, selfing could reinforce morphological stasis that  
627 might have evolved for other reasons.

628           The challenge of identifying cryptic *Galba* species is aggravated by their wide  
629 and poorly-known geographical distributions, recently scrambled by biological  
630 invasion. For example, *G. schirazensis* and *G. truncatula* have broadly expanded their  
631 distribution over recent decades (Brown 1994; Bargues et al. 2001, 2011a; Vinarski and  
632 Kantor 2016; Lounnas et al. 2018). We have documented up to three *Galba* species  
633 occurring in some South American sites (Table S1). Their identification is not possible  
634 without molecular tools.

635           The specific identity of *Galba* populations is important because they are  
636 involved in the transmission of fasciolosis caused by the liver fluke *F. hepatica*. Some  
637 studies have shown that lymnaeid species demonstrate different patterns of  
638 susceptibility, host-parasite compatibility and immunological resistance to *F. hepatica*  
639 (Gutiérrez et al. 2003; Vázquez et al. 2014; Dreyfuss et al. 2015). Although all species  
640 can be infected under laboratory conditions (Vázquez et al. 2018), field transmission  
641 depends on ecological and sociological conditions. Cattle or wildlife do not occupy the  
642 same grazing habitats as infecting snails in many parts of the world (Sabourin et al.  
643 2018). Ecological studies should be performed to evaluate whether the several cryptic  
644 *Galba* species differ with regard to habitat preference, since our current knowledge is  
645 essentially limited to *G. truncatula* (Chapuis et al. 2007).

646

## 647 **Conclusions and future directions**

648 Lymnaeid populations of the genus *Galba* are of interest for addressing a variety of  
649 questions, including wide-scale biogeography, biological invasions, evolution of mating  
650 systems, and host-parasite interactions. Our work is a first attempt to clarify the  
651 phylogeny, systematics, and biogeographical distribution of this interesting group in the  
652 New World. We have constructed a variety of gene trees using classical approaches, as

653 well as a species tree based on a multispecies coalescent model that reconciles gene  
654 trees and provides a much better estimation accuracy for species tree topology than, for  
655 instance, concatenation (Heled and Drummond 2010). The inferred phylogenetic  
656 relationships among species varied, depending on the genes analyzed and techniques  
657 employed. Such a discordance is not unusual and has been reported in many different  
658 studies (e.g., Kutschera et al., 2014; Stewart et al., 2014; Suh et al., 2015), including in  
659 mollusks (Krug et al. 2013; Sales et al. 2013). Incomplete lineage sorting or  
660 introgressive hybridization of specific genes may indeed lead to such a result  
661 (Felsenstein 2004). Future studies could investigate which evolutionary processes (gene  
662 duplication, horizontal gene transfer, incomplete lineage sorting, hybridization) gave  
663 rise to the incongruence we have observed in gene and species trees.

664         The integration of fossil data would also likely provide more accurate insights  
665 into macroevolutionary dynamics of *Galba* than molecular phylogenies alone. The  
666 fossil record has proven very helpful in determining the phylogeny of groups containing  
667 hard body parts like plants, mammals, and mollusks (Magallón and Sanderson 2005;  
668 Agnarsson et al. 2011; Bolotov et al. 2016). But unlike marine gastropods that have a  
669 diverse fossil record with many helpful shell characters (sculptures, ornamentation,  
670 coloration, protoconch; Bouchet and Strong 2010), fossil freshwater pulmonates are  
671 scarce and lack useful taxonomic characters. The fossils that have been attributed to  
672 *Galba* are not strikingly distinct from those of other species belonging to other genera  
673 of Lymnaeids. Baker (1911) reported *Galba*-like fossils in the Cretaceous of North  
674 America, but these shells might also belong to other genera of Lymnaeids, or even an  
675 ancestor of current Lymnaeids. When the generalized shell morphology is added to the  
676 absence of anatomical data, the application of fossil data to *Galba* phylogenetic  
677 reconstruction becomes excessively problematic.

678           Although our study was conducted at an extremely large geographic scale,  
679 especially in America, *Galba* populations occur on almost all continents. Much more  
680 extensive sampling and molecular analysis will be required to get a worldwide picture  
681 of the phylogeny and distribution of the genus. Of special interest is North America,  
682 where we have confirmed the occurrence of *G. humilis*, *G. cubensis/viator*, and *G.*  
683 *schirazensis*. We did not, however, confirm *G. truncatula*, despite its otherwise  
684 worldwide distribution (Bargues et al. 2001; Correa et al. 2011; Vinarski et al. 2011;  
685 Novobilský et al. 2014). The recent arrival of *G. schirazensis* in Europe and the Middle  
686 East (Bargues et al. 2011a; Lounnas et al. 2018) and the recent description of *Galba*  
687 *robusta* from Yemen, based on shell and penial morphology alone (Vinarski 2018)  
688 should be confirmed with molecular approaches.

689           Broader, worldwide sampling will be required to (i) confirm that the European,  
690 African and Asian populations referred to as *G. truncatula* actually belong to this  
691 species, (ii) clarify the biogeographic origin of *G. truncatula*, (iii) evaluate whether the  
692 *G. cubensis/viator* and *G. cousini/meridensis* groups constitute species complexes or  
693 single species with wide diversity, (iv) understand how the invasive species (especially  
694 *G. truncatula* and *G. schirazensis*) are spreading, and (v) confirm the loss of genetic  
695 variation in those populations as reported by other authors (Meunier et al. 2001;  
696 Lounnas et al. 2018).

697           It might also be useful to construct maps of *Galba* absence, possibly associated  
698 with detection probabilities. For example, *Galba* has not been found in Northern Brazil  
699 (Paraense 1982), possibly because the acidic waters of the Amazon and Orinoco rivers  
700 have blocked colonization (Paraense 1982, 1983). *Galba* populations are also absent  
701 from the most southern regions of Argentina (authors' unpublished data). Negative  
702 records in species distribution can be important when constructing accurate distribution

703 maps and inferring species-environment associations (Brotons et al. 2004). Models  
704 based only on presence data are less predictive (Václavík and Meentemeyer 2009).  
705 Absence data have been used to good effect modelling the spatial distribution of the  
706 medically important freshwater snail species *Bulinus globosus*, *Biomphalaria pfeifferi*,  
707 and *Radix natalensis* in Zimbabwe and predicting their distribution in a future climate  
708 (Pedersen et al. 2014).

709 More detailed ecological studies, based on long-term surveys of sites and  
710 analyses of life-history traits under laboratory conditions (e.g., Chapuis et al., 2007)  
711 would facilitate our understanding of species interactions and the transmission of *F.*  
712 *hepatica* (Sabourin et al. 2018). For example, *G. schirazensis* seems to be spreading  
713 very efficiently and genetic studies suggest that this is mainly due to one genetic clone  
714 (Lounnas et al. 2018). Studying the competitive and transmissive abilities of this clone,  
715 compared to both other *G. schirazensis* and other *Galba* species would be worthwhile.

716

## 717 **Data and code accessibility**

718 Xml files for phylogenetic analyses are available from the Zenodo repository  
719 (<https://zenodo.org/record/3473937#.XZiPcC0ryTd>).

720

## 721 **Acknowledgments**

722 We would like to express our gratitude to Nicolás Bonel for useful comments on earlier  
723 drafts of the manuscript and Harry G. Lee for advice and assistance on the taxonomy.

724 We thank Jimena Guerrero, Björn Stelbrink and Thomas Wilke for suggestions on  
725 phylogenetic analyses and for Graham R. Jones, Patricio Maturana Russel and Remco  
726 R. Bouckaert for assistance in running STACEY and Multi-threaded nested sampling.

727 We thank the reviewers Pável Matos-Maraví and Christelle Fraïsse and the

728 recommender from PCI in Evolutionary Biology Fabien Condamine for their thoughtful  
729 comments and suggestions. Fellowships granted by Erasmus Mundus PRECIOSA and  
730 Méditerranée Infection supported research stays of PA at the Institute de Recherche  
731 pour le Développement, MIVEGEC (Montpellier, France). AV was supported by a  
732 grant from IRD (BEST) and ML by a doctoral fellowship from University of  
733 Montpellier and a post-doctoral grant from Labex CeMeb. This study was financially  
734 supported by IRD, CNRS, ECOS-SUD (A16B02) and Malacological Society of  
735 London.

736

### 737 **Conflict of interest disclosure**

738 The authors of this preprint declare that they have no financial conflict of interest with  
739 the content of this article. Philippe Jarne is one of the PCI Evolutionary Biology  
740 recommenders.



741 **References**

- 742 Agnarsson I., Zambrana-Torrel C.M., Flores-Saldana N.P., May-Collado L.J. 2011. A  
743 time-calibrated species-level phylogeny of bats (Chiroptera, Mammalia). PLoS Curr.  
744 3:RRN1212.
- 745 Albrecht C., Wolff C., Glöer P., Wilke T. 2008. Concurrent evolution of ancient sister  
746 lakes and sister species: the freshwater gastropod genus *Radix* in lakes Ohrid and  
747 Prespa. Hydrobiologia. 615:157–167.
- 748 Alda P., Lounnas M., Vázquez A.A., Ayaqui R., Calvopiña M., Celi-Erazo M., Dillon  
749 R.T., Jarne P., Loker E.S., Muñoz Pareja F.C., Muzzio-Aroca J., Nárvaez A.O., Noya  
750 O., Robles L.M., Rodríguez-Hidalgo R., Uribe N., David P., Pointier J.-P., Hurtrez-  
751 Boussès S. 2018. A new multiplex PCR assay to distinguish among three cryptic *Galba*  
752 species, intermediate hosts of *Fasciola hepatica*. Veterinary Parasitology. 251:101–105.
- 753 Almeyda-Artigas R.J., Bargues M.D., Mas-Coma S. 2000. ITS-2 rDNA sequencing of  
754 *Gnathostoma* species (Nematoda) and elucidation of the species causing human  
755 gnathostomiasis in the Americas. The Journal of parasitology. 86:537–544.
- 756 Artigas P., Bargues M.D., Mera y Sierra R.L., Agramunt V.H., Mas-Coma S. 2011.  
757 Characterisation of fascioliasis lymnaeid intermediate hosts from Chile by DNA  
758 sequencing, with emphasis on *Lymnaea viator* and *Galba truncatula*. Acta Tropica.  
759 120:245–257.
- 760 Baker F.C. 1911. The Lymnaeidae of North and Middle America, recent and fossil.  
761 Chicago: The Academy.
- 762 Bargues M., Artigas P., Khoubbane M., Ortiz P., Naquira C., Mas-Coma S. 2012.  
763 Molecular characterisation of *Galba truncatula*, *Lymnaea neotropica* and *L.*  
764 *schirazensis* from Cajamarca, Peru and their potential role in transmission of human and  
765 animal fascioliasis. Parasites & Vectors. 5:174.

- 766 Bargues M.D., Artigas P., Khoubbane M., Flores R., Glöer P., Rojas-García R., Ashrafi  
767 K., Falkner G., Mas-Coma S. 2011a. *Lymnaea schirazensis*, an overlooked snail  
768 distorting fascioliasis data: genotype, phenotype, ecology, worldwide spread,  
769 susceptibility, applicability. PLoS ONE. 6:e24567.
- 770 Bargues M.D., Artigas P., Khoubbane M., Mas-Coma S. 2011b. DNA sequence  
771 characterisation and phylogeography of *Lymnaea cousini* and related species, vectors of  
772 fascioliasis in northern Andean countries, with description of *L. meridensis* n. sp.  
773 (Gastropoda: Lymnaeidae). Parasites & Vectors. 4:132.
- 774 Bargues M.D., Artigas P., Mera y Sierra R., Pointier J.-P., Mas-Coma S. 2007.  
775 Characterisation of *Lymnaea cubensis*, *L. viatrix* and *L. neotropica* n. sp., the main  
776 vectors of *Fasciola hepatica* in Latin America, by analysis of their ribosomal and  
777 mitochondrial DNA. Annals of Tropical Medicine & Parasitology. 101:621–641.
- 778 Bargues M.D., González C.L., Artigas P., Mas-Coma S. 2011c. A new baseline for  
779 fascioliasis in Venezuela: lymnaeid vectors ascertained by DNA sequencing and  
780 analysis of their relationships with human and animal infection. Parasites & Vectors.  
781 4:1–18.
- 782 Bargues M.D., Vigo M., Horak P., Dvorak J., Patzner R.A., Pointier J.P., Jackiewicz  
783 M., Meier-Brook C., Mas-Coma S. 2001. European Lymnaeidae (Mollusca:  
784 Gastropoda), intermediate hosts of trematodiasoses, based on nuclear ribosomal DNA  
785 ITS-2 sequences. Infection, Genetics and Evolution. 1:85–107.
- 786 Bespalaya Y.V., Bolotov I.N., Aksenova O.V., Gofarov M.Yu., Kondakov A.V.,  
787 Vikhrev I.V., Vinarski M.V. 2018. DNA barcoding reveals invasion of two cryptic  
788 *Sinanodonta* mussel species (Bivalvia: Unionidae) into the largest Siberian river.  
789 Limnologica. 69:94–102.
- 790 Bickford D., Lohman D.J., Sodhi N.S., Ng P.K.L., Meier R., Winker K., Ingram K.K.,

- 791 Das I. 2007. Cryptic species as a window on diversity and conservation. *Trends in*  
792 *Ecology & Evolution*. 22:148–155.
- 793 Bolotov I.N., Vikhrev I.V., Bespalaya Y.V., Gofarov M.Y., Kondakov A.V., Konopleva  
794 E.S., Bolotov N.N., Lyubas A.A. 2016. Multi-locus fossil-calibrated phylogeny,  
795 biogeography and a subgeneric revision of the Margaritiferidae (Mollusca: Bivalvia:  
796 Unionoida). *Molecular Phylogenetics and Evolution*. 103:104–121.
- 797 Bouchet P., Strong E. 2010. Historical name-bearing types in marine molluscs: an  
798 impediment to biodiversity studies? In: Polaszek A., editor. *Systema Naturae 250 - The*  
799 *Linnaean Ark*. CRC Press. p. 63–74.
- 800 Bouckaert R., Heled J. 2014. DensiTree 2: Seeing trees through the forest.  
801 <https://doi.org/10.1101/012401>.
- 802 Bouckaert R., Heled J., Kühnert D., Vaughan T., Wu C.-H., Xie D., Suchard M.A.,  
803 Rambaut A., Drummond A.J. 2014. BEAST 2: A software platform for Bayesian  
804 evolutionary analysis. *PLoS Computational Biology*. 10:e1003537.
- 805 Bouckaert R.R., Drummond A.J. 2017. bModelTest: Bayesian phylogenetic site model  
806 averaging and model comparison. *BMC Evolutionary Biology*. 17.
- 807 Bourdeau P.E., Butlin R.K., Brönmark C., Edgell T.C., Hoverman J.T., Hollander J.  
808 2015. What can aquatic gastropods tell us about phenotypic plasticity? A review and  
809 meta-analysis. *Heredity*. 115:312–321.
- 810 Brotons L., Thuiller W., Araújo M.B., Hirzel A.H. 2004. Presence-absence versus  
811 presence-only modelling methods for predicting bird habitat suitability. *Ecography*.  
812 27:437–448.
- 813 Brown D.S. 1994. *Freshwater snails of Africa and their medical importance*. London:  
814 Taylor & Francis.
- 815 Burch J.B. 1982. *North American freshwater snails*. Transactions of the POETS

- 816 Society. 1:217–365.
- 817 Burgarella C., Gayral P., Ballenghien M., Bernard A., David P., Jarne P., Correa A.,  
818 Hurtrez-Boussès S., Escobar J., Galtier N., Glémin S. 2015. Molecular evolution of  
819 freshwater snails with contrasting mating systems. *Molecular Biology and Evolution*.  
820 32:2403–2416.
- 821 Castresana J. 2000. Selection of conserved blocks from multiple alignments for their  
822 use in phylogenetic analysis. *Molecular Biology and Evolution*. 17:540–552.
- 823 Chapuis E., Trouve S., Facon B., Degen L., Goudet J. 2007. High quantitative and no  
824 molecular differentiation of a freshwater snail (*Galba truncatula*) between temporary  
825 and permanent water habitats. *Molecular Ecology*. 16:3484–3496.
- 826 Coleman A.W., Vacquier V.D. 2002. Exploring the phylogenetic utility of ITS  
827 sequences for animals: a test case for *Abalone* (*Haliotis*). *Journal of Molecular*  
828 *Evolution*. 54:246–257.
- 829 Correa A.C., Escobar J.S., Durand P., Renaud F., David P., Jarne P., Pointier J.-P.,  
830 Hurtrez-Boussès S. 2010. Bridging gaps in the molecular phylogeny of the Lymnaeidae  
831 (Gastropoda: Pulmonata), vectors of Fascioliasis. *BMC Evolutionary Biology*. 10:381.
- 832 Correa A.C., Escobar J.S., Noya O., Velásquez L.E., González-Ramírez C., Hurtrez-  
833 Boussès S., Pointier J.-P. 2011. Morphological and molecular characterization of  
834 Neotropic Lymnaeidae (Gastropoda: Lymnaeoidea), vectors of fasciolosis. *Infection,*  
835 *Genetics and Evolution*. 11:1978–1988.
- 836 Coyne J.A., Orr A.H. 2004. *Speciation*. Sunderland, Massachusetts: Sinauer Associates,  
837 Inc. Publ.
- 838 Dayrat B. 2005. Towards integrative taxonomy: integrative taxonomy. *Biological*  
839 *Journal of the Linnean Society*. 85:407–415.
- 840 Dayrat B., Conrad M., Balayan S., White T.R., Albrecht C., Golding R., Gomes S.R.,

- 841 Harasewych M.G., de Frias Martins A.M. 2011. Phylogenetic relationships and  
842 evolution of pulmonate gastropods (Mollusca): New insights from increased taxon  
843 sampling. *Molecular Phylogenetics and Evolution*. 59:425–437.
- 844 De Queiroz K. 2007. Species concepts and species delimitation. *Systematic Biology*.  
845 56:879–886.
- 846 Dillon R.T., Wethington A.R., Lydeard C. 2011. The evolution of reproductive isolation  
847 in a simultaneous hermaphrodite, the freshwater snail *Physa*. *BMC Evolutionary*  
848 *Biology*. 11.
- 849 D’Orbigny A. 1835. Synopsis terrestrium et fluviatilium molluscorum, in suo per  
850 Americam meridionalem itinere, ab A. D’Orbigny, collectorum. *Mag de Zoologie*. 5:1–  
851 44.
- 852 Dreyfuss G., Correa A.C., Djuikwo-Teukeng F.F., Novobilský A., Höglund J., Pankrác  
853 J., Kašný M., Vignoles P., Hurtrez-Boussès S., Pointier J.P., Rondelaud D. 2015.  
854 Differences in the compatibility of infection between the liver flukes *Fascioloides*  
855 *magna* and *Fasciola hepatica* in a Colombian population of the snail *Galba* sp. *Journal*  
856 *of Helminthology*. 89:720–726.
- 857 Dunn A.M., Hatcher M.J. 2015. Parasites and biological invasions: parallels,  
858 interactions, and control. *Trends in Parasitology*. 31:189–199.
- 859 Ebbs E.T., Loker E.S., Brant S.V. 2018. Phylogeography and genetics of the globally  
860 invasive snail *Physa acuta* Draparnaud 1805, and its potential to serve as an  
861 intermediate host to larval digenetic trematodes. *BMC Evolutionary Biology*. 18.
- 862 Escobar J.S., Auld J.R., Correa A.C., Alonso J.M., Bony Y.K., Coutellec M.-A., Koene  
863 J.M., Pointier J.-P., Jarne P., David P. 2011. Patterns of mating-system evolution in  
864 hermaphroditic animals: correlations among selfing rate, inbreeding depression, and the  
865 timing of reproduction: mating-system evolution in hermaphroditic animals. *Evolution*.

- 866 65:1233–1253.
- 867 Estoup A., Martin O. 1996. Marqueurs microsatellites: isolement à l'aide de sondes  
868 non-radioactives, caractérisation et mise au point. .
- 869 Fang Y.-W., Liu L.-Y., Zhang H.-L., Jiang D.-F., Chu D. 2014. Competitive ability and  
870 fitness differences between two introduced populations of the invasive whitefly *Bemisia*  
871 *tabaci* Q in China. PLoS ONE. 9:e100423.
- 872 Felsenstein J. 2004. Inferring phylogenies. Sunderland, Mass: Sinauer Associates.
- 873 Fišer C., Robinson C.T., Malard F. 2018. Cryptic species as a window into the  
874 paradigm shift of the species concept. Molecular Ecology. 27:613–635.
- 875 Folmer O., Black M., Hoeh W., Lutz R., Vrijenhoek R. 1994. DNA primers for  
876 amplification of mitochondrial cytochrome c oxidase subunit I from diverse metazoan  
877 invertebrates. Molecular marine biology and biotechnology. 3:294–299.
- 878 Fourdrilis S., Mardulyn P., Hardy O.J., Jordaens K., de Frias Martins A.M., Backeljau  
879 T. 2016. Mitochondrial DNA hyperdiversity and its potential causes in the marine  
880 periwinkle *Melarhaphe neritoides* (Mollusca: Gastropoda). PeerJ. 4:e2549.
- 881 Gomez S., Fleeger J.W., Rocha-Olivares A., Foltz D. 2004. Four new species of  
882 *Cletocamptus* Schmankewitsch, 1875, closely related to *Cletocamptus deitersi* (Richard,  
883 1897) (Copepoda: Harpacticoida). Journal of Natural History. 38:2669–2732.
- 884 Gutiérrez A., Pointier J.-P., Fraga J., Jobet E., Modat S., Pérez R.T., Yong M., Sanchez  
885 J., Loker E.S., Théron A. 2003. *Fasciola hepatica*: identification of molecular markers  
886 for resistant and susceptible *Pseudosuccinea columella* snail hosts. Experimental  
887 Parasitology. 105:211–218.
- 888 Heled J., Drummond A.J. 2010. Bayesian inference of species trees from multilocus  
889 data. Molecular Biology and Evolution. 27:570–580.
- 890 Hubendick B. 1951. Recent Lymnaeidae, their variation, morphology, taxonomy,

- 891 nomenclature and distribution. *Kungl Svenska Vetenskapsakademiens Handlingar*. 3:1–  
892 223.
- 893 Jarić I., Heger T., Castro Monzon F., Jeschke J.M., Kowarik I., McConkey K.R., Pyšek  
894 P., Sagouis A., Essl F. 2019. Crypticity in biological invasions. *Trends in Ecology &*  
895 *Evolution*.
- 896 Jarne P., Pointier J.-P., David P., Koene J.M. 2010. Basommatophoran gastropods. *The*  
897 *evolution of primary sexual characters in animals*. Oxford University Press. p. 173–196.
- 898 Johnson P.D., Bogan A.E., Brown K.M., Burkhead N.M., Cordeiro J.R., Garner J.T.,  
899 Hartfield P.D., Lepitzki D.A.W., Mackie G.L., Pip E., Tarpley T.A., Tiemann J.S.,  
900 Whelan N.V., Strong E.E. 2013. Conservation status of freshwater gastropods of  
901 Canada and the United States. *Fisheries*. 38:247–282.
- 902 Jones G. 2017. Algorithmic improvements to species delimitation and phylogeny  
903 estimation under the multispecies coalescent. *J. Math. Biol.* 74:447–467.
- 904 Katoh K., Standley D.M. 2013. MAFFT multiple sequence alignment software version  
905 7: improvements in performance and usability. *Molecular Biology and Evolution*.  
906 30:772–780.
- 907 Katz A.D., Taylor S.J., Davis M.A. 2018. At the confluence of vicariance and dispersal:  
908 Phylogeography of cavernicolous springtails (Collembola: Arrhopalitidae,  
909 Tomoceridae) codistributed across a geologically complex karst landscape in Illinois  
910 and Missouri. *Ecology and Evolution*. 8:10306–10325.
- 911 Kolar C.S., Lodge D.M. 2001. Progress in invasion biology: predicting invaders. *Trends*  
912 *in Ecology & Evolution*. 16:199–204.
- 913 Krug P.J., Vendetti J.E., Rodriguez A.K., Retana J.N., Hirano Y.M., Trowbridge C.D.  
914 2013. Integrative species delimitation in photosynthetic sea slugs reveals twenty  
915 candidate species in three nominal taxa studied for drug discovery, plastid symbiosis or

- 916 biological control. *Molecular Phylogenetics and Evolution*. 69:1101–1119.
- 917 Kutschera V.E., Bidon T., Hailer F., Rodi J.L., Fain S.R., Janke A. 2014. Bears in a  
918 forest of gene trees: phylogenetic inference is complicated by incomplete lineage  
919 sorting and gene flow. *Molecular Biology and Evolution*. 31:2004–2017.
- 920 Leaché A.D., Fujita M.K., Minin V.N., Bouckaert R.R. 2014. Species delimitation  
921 using genome-wide SNP data. *Systematic Biology*. 63:534–542.
- 922 Leigh J.W., Bryant D. 2015. PopART: full-feature software for haplotype network  
923 construction. *Methods Ecol Evol*. 6:1110–1116.
- 924 Lounnas M., Correa A.C., Alda P., David P., Dubois M.-P., Calvopiña M., Caron Y.,  
925 Celi-Eraza M., Dung B.T., Jarne P., Loker E.S., Noya O., Rodríguez-Hidalgo R., Toty  
926 C., Uribe N., Pointier J.-P., Hurtrez-Boussès S. 2018. Population structure and genetic  
927 diversity in the invasive freshwater snail *Galba schirazensis* (Lymnaeidae). *Canadian*  
928 *Journal of Zoology*. 96:425–435.
- 929 Lounnas M., Vázquez A.A., Alda P., Sartori K., Pointier J.-P., David P., Hurtrez-  
930 Boussès S. 2017. Isolation, characterization and population-genetic analysis of  
931 microsatellite loci in the freshwater snail *Galba cubensis* (Lymnaeidae). *Journal of*  
932 *Molluscan Studies*. 83:63–68.
- 933 Magallón S.A., Sanderson M.J. 2005. Angiosperm divergence times: the effect of  
934 genes, codon positions, and time constraints. *Evol*. 59:1653.
- 935 Mas-Coma S., Bargues M.D., Valero M. a. 2005. Fascioliasis and other plant-borne  
936 trematode zoonoses. *International Journal for Parasitology*. 35:1255–1278.
- 937 Matos-Maravi P., Wahlberg N., Antonelli A., Penz C. 2019. Species limits in butterflies  
938 (Lepidoptera: Nymphalidae): Reconciling classical taxonomy with the multispecies  
939 coalescent. *Systematic Entomology*, 44:745–756.
- 940 Mavárez J., Pointier J.-P., David P., Delay B., Jarne P. 2002. Genetic differentiation,



- 941 dispersal and mating system in the schistosome-transmitting freshwater snail  
942 *Biomphalaria glabrata*. *Heredity*. 89:258–265.
- 943 Medeiros C., Scholte R.G.C., D'Ávila S., Caldeira R.L., Carvalho O.D.S. 2014. Spatial  
944 distribution of Lymnaeidae (Mollusca, Basommatophora), intermediate host of *Fasciola*  
945 *hepatica* Linnaeus, 1758 (Trematoda, Digenea) in Brazil. *Revista do Instituto de*  
946 *Medicina Tropical de São Paulo*. 56:235–252.
- 947 Meunier C., Hurtrez-Bousses S., Durand P., Rondelaud D., Renaud F. 2004. Small  
948 effective population sizes in a widespread selfing species, *Lymnaea truncatula*  
949 (Gastropoda: Pulmonata). *Molecular Ecology*. 13:2535–2543.
- 950 Meunier C., Tirard, C., Hurtrez-Bousses S., Durand P., Bargues M.D., Mas-Coma S.,  
951 Pointier J.P., Jourdane J., Renaud F. 2001. Lack of molluscan host diversity and the  
952 transmission of an emerging parasitic disease in Bolivia. *Molecular Ecology*. 10:1333–  
953 1340.
- 954 Miller M.A., Pfeiffer W., Schwartz T. 2012. The CIPRES science gateway: enabling  
955 high-impact science for phylogenetics researchers with limited resources. :1.
- 956 Niemiller M.L., Near T.J., Fitzpatrick B.M. 2012. Delimiting species using multilocus  
957 data: diagnosing cryptic diversity in the southern cavefish, *Typhlichthys subterraneus*  
958 (Teleostei: Amblyopsidae): species delimitation in cavefish. *Evolution*. 66:846–866.
- 959 Noël E., Jarne P., Glémin S., MacKenzie A., Segard A., Sarda V., David P. 2017.  
960 Experimental evidence for the negative effects of self-fertilization on the adaptive  
961 potential of populations. *Current Biology*. 27:237–242.
- 962 Novobilský A., Engström A., Sollenberg S., Gustafsson K., Morrison D.A., Höglund J.  
963 2014. Transmission patterns of *Fasciola hepatica* to ruminants in Sweden. *Veterinary*  
964 *Parasitology*. 203:276–286.
- 965 Ogilvie H.A., Bouckaert R.R., Drummond A.J. 2017. StarBEAST2 brings faster species

- 966 tree inference and accurate estimates of substitution rates. *Molecular Biology and*  
967 *Evolution*. 34:2101–2114.
- 968 Orlando Narváez A., Aroca J.M., Alda P., Macías V., Lounnas M., Hurtrez-Boussès S.,  
969 Noya O., Martini Robles L., Pointier J.-P. 2017. Primer reporte de *Galba cubensis*  
970 (Gastropoda: Lymnaeidae) en el Ecuador, hospedador potencial de *Fasciola hepatica* en  
971 arrozales de la costa ecuatoriana. *El Misionero del Agro*. 13:36–47.
- 972 Paraense W.L. 1982. *Lymnaea rupestris* sp. n. from Southern Brazil (Pulmonata:  
973 Lymnaeidae). *Memórias do Instituto Oswaldo Cruz*. 77:437–443.
- 974 Paraense W.L. 1983. *Lymnaea columella* in northern Brazil. *Memórias do Instituto*  
975 *Oswaldo Cruz*. 78:477–482.
- 976 Paraense W.L. 1995. *Lymnaea cousini* Jousseume, 1887, from Ecuador (Gastropoda:  
977 Lymnaeidae). *Memórias do Instituto Oswaldo Cruz*. 90:605–609.
- 978 Pedersen U.B., Stendel M., Midzi N., Mduluza T., Soko W., Stensgaard A.-S.,  
979 Vennervald B.J., Mukaratirwa S., Kristensen T.K. 2014. Modelling climate change  
980 impact on the spatial distribution of fresh water snails hosting trematodes in Zimbabwe.  
981 *Parasites & Vectors*. 7:536.
- 982 Pfeiffer L. 1839. Bericht über die Ergebnisse maine Reise nach Kuba im Winter 1838-  
983 1839. *Archiv für Naturgeschichte*. 5:346–358.
- 984 Pfenninger M., Cordellier M., Streit B. 2006. Comparing the efficacy of morphologic  
985 and DNA-based taxonomy in the freshwater gastropod genus *Radix* (Basommatophora,  
986 Pulmonata). *BMC Evolutionary Biology*.:14.
- 987 Pfenninger M., Schwenk K. 2007. Cryptic animal species are homogeneously  
988 distributed among taxa and biogeographical regions. *BMC Evolutionary Biology*.  
989 7:121.
- 990 Pinceel J., Jordaens K., Backeljau T. 2005. Extreme mtDNA divergences in a terrestrial

991 slug (Gastropoda, Pulmonata, Arionidae): accelerated evolution, allopatric divergence  
992 and secondary contact: Molecular divergence in a terrestrial slug. *Journal of*  
993 *Evolutionary Biology*. 18:1264–1280.

994 Pointier J., Noya O., Amarista M., Théron A. 2004. *Lymnaea cousini* Jousseume, 1887  
995 (Gastropoda: Lymnaeidae): first record for Venezuela. *Memórias do Instituto Oswaldo*  
996 *Cruz*. 99:567–569.

997 Pointier J.-P. 2015. Freshwater molluscs of Venezuela and their medical and veterinary  
998 importance. Harxheim: ConchBooks.

999 Puillandre N., Lambert A., Brouillet S., Achaz G. 2012. ABGD, Automatic Barcode  
1000 Gap Discovery for primary species delimitation: ABGD, automatic barcode gap  
1001 discovery. *Molecular Ecology*. 21:1864–1877.

1002 Qian Z., Yang J., Lu Y., He J. 2012. Description of three freshwater species  
1003 (Gastropoda) from China. *Shell Discoveries*. 1:30–31.

1004 Rama Rao S., Liew T.-S., Yow Y.-Y., Ratnayeke S. 2018. Cryptic diversity: Two  
1005 morphologically similar species of invasive apple snail in Peninsular Malaysia. *PLOS*  
1006 *ONE*. 13:e0196582.

1007 Rambaut A., Drummond A.J., Xie D., Baele G., Suchard M.A. 2018. Posterior  
1008 summarization in bayesian phylogenetics using Tracer 1.7. *Systematic Biology*.

1009 Ree R.H., Smith S.A. 2008. Maximum likelihood inference of geographic range  
1010 evolution by dispersal, local extinction, and cladogene. *Systematic Biology*. 57:4–14.

1011 Remigio E. 2002. Molecular phylogenetic relationships in the aquatic snail genus  
1012 *Lymnaea*, the intermediate host of the causative agent of fascioliasis: insights from  
1013 broader taxon sampling. *Parasitology Research*. 88:687–696.

1014 Remigio E.A., Blair D. 1997. Molecular systematics of the freshwater snail family  
1015 Lymnaeidae (Pulmonata: Basommatophora) utilising mitochondrial ribosomal DNA

- 1016 sequences. *J Mollus Stud.* 63:173–185.
- 1017 Ronquist F., Huelsenbeck J.P. 2003. MrBayes 3: Bayesian phylogenetic inference under  
1018 mixed models. *Bioinformatics.* 19:1572–1574.
- 1019 Russel P.M., Brewer B.J., Klaere S., Bouckaert R.R. 2019. Model selection and  
1020 parameter inference in phylogenetics using nested sampling. *Systematic Biology.*  
1021 68:219–233.
- 1022 Sabourin E., Alda P., Vázquez A., Hurtrez-Boussès S., Vittecoq M. 2018. Impact of  
1023 human activities on fasciolosis transmission. *Trends in Parasitology.* 34:891–903.
- 1024 Sales J.B. de L., Shaw P.W., Haimovici M., Markaida U., Cunha D.B., Ready J.,  
1025 Figueiredo-Ready W.M.B., Schneider H., Sampaio I. 2013. New molecular phylogeny  
1026 of the squids of the family Loliginidae with emphasis on the genus *Doryteuthis* Naef,  
1027 1912: Mitochondrial and nuclear sequences indicate the presence of cryptic species in  
1028 the southern Atlantic Ocean. *Molecular Phylogenetics and Evolution.* 68:293–299.
- 1029 Samadi S., Roumégoux A., Bargues M.D., Mas-Coma S., Yong M., Pointier J.-P. 2000.  
1030 Morphological studies of Lymnaeid snails from the human fasciolosis endemic zone of  
1031 Bolivia. *Journal Molluscan Studies.* 66:31–44.
- 1032 Sanabria R., Mouzet R., Pankrác J., Djuikwo Teukeng F.F., Courtioux B., Novobilský  
1033 A., Höglund J., Kašný M., Vignoles P., Dreyfuss G., Rondelaud D., Romero J. 2013.  
1034 *Lymnaea neotropica* and *Lymnaea viatrix*, potential intermediate hosts for *Fascioloides*  
1035 *magna*. *Journal of Helminthology.* 87:494–500.
- 1036 Standley C.J., Prepelitchi L., Pietrokovsky S.M., Issia L., Stothard J., Wisnivesky-Colli  
1037 C. 2013. Molecular characterization of cryptic and sympatric lymnaeid species from the  
1038 *Galba/Fossaria* group in Mendoza Province, Northern Patagonia, Argentina. *Parasites*  
1039 *& Vectors.* 6:304.
- 1040 Stevenson J., Norris D. 2016. Implicating cryptic and novel anophelines as malaria

- 1041 vectors in Africa. *Insects*. 8:1.
- 1042 Stewart J.E., Timmer L.W., Lawrence C.B., Pryor B.M., Peever T.L. 2014. Discord  
1043 between morphological and phylogenetic species boundaries: incomplete lineage  
1044 sorting and recombination results in fuzzy species boundaries in an asexual fungal  
1045 pathogen. *BMC Evolutionary Biology*. 14:38.
- 1046 Struck T.H., Feder J.L., Bendiksbj M., Birkeland S., Cerca J., Gusarov V.I., Kistenich  
1047 S., Larsson K.-H., Liow L.H., Nowak M.D., Stedje B., Bachmann L., Dimitrov D. 2018.  
1048 Finding evolutionary processes hidden in cryptic species. *Trends in Ecology &  
1049 Evolution*. 33:153–163.
- 1050 Suh A., Smeds L., Ellegren H. 2015. The dynamics of incomplete lineage sorting across  
1051 the ancient adaptive radiation of neoavian birds. *PLOS Biology*. 13:e1002224.
- 1052 Taylor D.W. 2003. Introduction to Physidae (Gastropoda: Hygrophila); biogeography,  
1053 classification, morphology. *Revista de Biología Tropical*. 51:1–287.
- 1054 Thomaz D., Guiller A., Clarke B. 1996. Extreme divergence of mitochondrial DNA  
1055 within species of pulmonate land snails. *Proceedings of the Royal Society of London.  
1056 Series B: Biological Sciences*. 263:363–368.
- 1057 Václavík T., Meentemeyer R.K. 2009. Invasive species distribution modeling (iSDM):  
1058 Are absence data and dispersal constraints needed to predict actual distributions?  
1059 *Ecological Modelling*. 220:3248–3258.
- 1060 Vázquez A.A., Alda P., Lounnas M., Sabourin E., Alba A., Pointier J.-P., Hurtrez-  
1061 Boussès S. 2018. Lymnaeid snails hosts of *Fasciola hepatica* and *Fasciola gigantica*  
1062 (Trematoda: Digenea): a worldwide review. *CAB Reviews*. 13:1–15.
- 1063 Vázquez A.A., Sánchez J., Pointier J.-P., Théron A., Hurtrez-Boussès S. 2014. *Fasciola*  
1064 *hepatica* in Cuba: compatibility of different isolates with two intermediate snail hosts,  
1065 *Galba cubensis* and *Pseudosuccinea columella*. *Journal of Helminthology*. 88:434–440.

- 1066 Vinarski M.V. 2018. *Galba robusta* sp. nov. from Yemen (Gastropoda: Lymnaeidae).  
1067 *Zoosystematica Rossica*. 27:2–10.
- 1068 Vinarski M.V., Kantor J.I. 2016. Analytical catalogue of fresh and brackish water  
1069 molluscs of Russia and adjacent countries. Moscow: A.N. Severtsov Institute of  
1070 Ecology and Evolution of RAS.
- 1071 Vinarski M.V., Schniebs K., Glöer P., Hundsdoerfer A.K. 2011. The taxonomic status  
1072 and phylogenetic relationships of the genus *Aenigmomphiscola* Kruglov and  
1073 Starobogatov, 1981 (Gastropoda: Pulmonata: Lymnaeidae). *Journal of Natural History*.  
1074 45:2049–2068.
- 1075 Weigand A.M., Jochum A., Pfenninger M., Steinke D., Klussmann-Kolb A. 2011. A  
1076 new approach to an old conundrum-DNA barcoding sheds new light on phenotypic  
1077 plasticity and morphological stasis in microsnailes (Gastropoda, Pulmonata,  
1078 Carychiidae): DNA barcoding. *Molecular Ecology Resources*. 11:255–265.
- 1079 Weiss M., Weigand H., Weigand A.M., Leese F. 2018. Genome-wide single-nucleotide  
1080 polymorphism data reveal cryptic species within cryptic freshwater snail species-The  
1081 case of the *Ancylus fluviatilis* species complex. *Ecology and Evolution*. 8:1063–1072.
- 1082 Wilke T., Schultheiß R., Albrecht C. 2009. As time goes by: a simple fool’s guide to  
1083 molecular clock approaches in invertebrates. *American Malacological Bulletin*. 27:25–  
1084 45.
- 1085 Xia X. 2017. DAMBE6: new tools for microbial genomics, phylogenetics, and  
1086 molecular evolution. *Journal of Heredity*. 108:431–437.
- 1087 Yu Y., Harris A.J., Blair C., He X. 2015. RASP (Reconstruct Ancestral State in  
1088 Phylogenies): A tool for historical biogeography. *Molecular Phylogenetics and*  
1089 *Evolution*. 87:46–49.
- 1090 Yu Y., Harris A.J., He X. 2010. S-DIVA (Statistical Dispersal-Vicariance Analysis): A

- 1091 tool for inferring biogeographic histories. *Molecular Phylogenetics and Evolution*.
- 1092 56:848–850.
- 1093 Zulliger D.E., Lessios H.A. 2010. Phylogenetic relationships in the genus *Astropecten*
- 1094 Gray (Paxillosida: Astropectinidae) on a global scale: molecular evidence for
- 1095 morphological convergence, species-complexes and possible cryptic speciation.
- 1096 *Zootaxa*.:1–19.
- 1097

1098 **Table 1.** Type localities of *Galba* species and sequences of individuals recovered in those localities. References mentioned are the ones in which  
 1099 sequences were provided and not in which species were described, except for articles describing *Galba meridensis* and *Galba neotropica* were  
 1100 the authors also provided sequences (Bargues et al. 2007, 2011b). The type localities for *Galba cubensis* and *Galba viator* were here restricted  
 1101 because original description of the species did not provide a locality, authors simply stated “Cuba” and “Patagonia”, respectively (D’Orbigny  
 1102 1835; Pfeiffer 1839).

| Species                   | Country   | Locality                                        | Coordinates                   | ITS1                  | ITS2                  | 16S      | COI                   | Reference            |
|---------------------------|-----------|-------------------------------------------------|-------------------------------|-----------------------|-----------------------|----------|-----------------------|----------------------|
| <i>Galba cousini</i>      | Ecuador   | Chanchu-Yacu                                    | 00°18'55"S<br>78°34'02"W      | FN598157              | FN598153              | -        | FN598161              | Bargues et al. 2011b |
| <i>Galba cubensis</i>     | Cuba      | Vaqueria 21                                     | 23°01'N<br>82°32'W            | AM412226              | AM412223              | -        | AM494009              | Bargues et al. 2007  |
| <i>Galba humilis</i>      | USA       | Owego, New York                                 | 42°06'01"N<br>76°15'40"W      | FN182193,<br>FN182194 | FN182191,<br>FN182192 | -        | FN182197,<br>FN182198 | Correa et al. 2011   |
| <i>Galba meridensis</i>   | Venezuela | Laguna Mucubají (Mérida)                        | 08°47'52"N<br>70°49'32"W      | FN598159              | FN598154              | -        | FN598164              | Bargues et al. 2011b |
| <i>Galba neotropica</i>   | Peru      | Lima, Rio Rimac                                 | 12°02'S<br>76°56'–<br>77°08'W | AM412228              | AM412225              | -        | AM494008              | Bargues et al. 2007  |
| <i>Galba schirazensis</i> | Iran      | Taleb Abad river, Bandar Anzali, Gilan province | 37°27'46"N<br>49°37'07"E      | JF272603              | JF272601              | JF272605 | JF272607              | Bargues et al. 2011a |



|                         |           |                                       |                      |          |                       |   |                       |                         |
|-------------------------|-----------|---------------------------------------|----------------------|----------|-----------------------|---|-----------------------|-------------------------|
| <i>Galba truncatula</i> | Germany   | Thuringia,<br>Erfurt-<br>Bindersleben | ND                   | -        | -                     | - | EU818799              | Albrecht et al.<br>2008 |
| <i>Galba viator</i>     | Argentina | Frias                                 | 40°14' S<br>64°10' W | JN614428 | HQ283265,<br>JN614465 | - | JN614397,<br>JN614398 | Correa et al. 2011      |

---

1103 **Figures captions**

1104 **Figure 1.** The three-step procedure followed to identify the 1,722 individuals of *Galba*  
1105 species. The number of individuals identified at each step is indicated in the left and the  
1106 species identified are indicated on the right. In Step 1, we photographed the shell and  
1107 dissected three to five adult snails from each of the 166 sites. Fragments of the ITS2 and  
1108 COI genes were sequenced in 146 individuals: *Galba cousini/meridensis* (1), *Galba*  
1109 *cubensis* (41), *Galba schirazensis* (41), *Galba truncatula* (30), *Galba humilis* (34) and  
1110 *Galba viator* (1).

1111 **Figure 2.** Geographic distribution of *Galba* species in America, based on molecular  
1112 identification. Coordinates are given in Tables S1–S2. The sites Perdriel (Argentina),  
1113 Batallas and Tambillo (Bolivia), Ontario (Canada), San Rafael (Mexico), Canal Salinas  
1114 (Puerto Rico) are not represented since coordinates are missing in the original  
1115 publications.

1116 **Figure 3.** Time-calibrated phylogenetic hypotheses of the model that best approximate  
1117 species status in *Galba* and species-delimitation methods. The trees showed are the  
1118 most probable topologies based on the multispecies tree model that showed the highest  
1119 Bayes Factor in StarBeast2 (visualized in Densitree), as a function of time (in Mya).  
1120 Greater topological agreement is visualized by a higher density of trees (on the left),  
1121 whereas uncertainty in the height and distribution of nodes are represented by increased  
1122 transparency. The most common topologies are shown in blue, the second most  
1123 common topologies in red and the third in green. The six clusters built with individual  
1124 gene trees are indicated on the extreme right. The number of species recovered varied  
1125 with eight approaches (ABGD with each gene, StarBeast with all genes, STACEY with  
1126 a variable number of species included as prior). For each approach, the colored bars  
1127 represent different species. Bars were striped when the groups included more than one

1128 species. Clusters as appeared in text are shown in roman numbers. Scale bar represents

1129 branch length expressed as number of substitutions per site.

1130 **Figure 4.** Most common topology of the species tree and phenotype of the most recent

1131 common ancestor of *Galba* inferred in StarBeast2. The probability of a cryptic

1132 phenotype in the most recent common ancestor of *Galba* species is 100% according to S

1133 -DEC and BBM and 78% according to S-DIVA. Clusters as appeared in text are shown

1134 in roman numbers. Node values indicate posterior probability and blue bars indicate

1135 95% credibility intervals. The mating system is indicated on the right.

## 1136 **Supplementary Material**

### 1137 **Table legends**

1138 **Table S1.** Sampled sites from America in which *Galba* species were found. Individuals  
1139 were submitted to the three-step procedures for species identification (see text and Fig.  
1140 1). For each site, we provide the country, site name, geographic coordinates, sampling  
1141 date, and number of sampled individuals. Note that only a fraction of sampled  
1142 individuals was sequenced. For each step (and species), we indicate the number of  
1143 individuals considered. NA: not available. \* indicate sites that have been resampled at  
1144 different dates. Accession names in GenBank (ITS2 and COI) are indicated into  
1145 parentheses. Note that in some cases a single sequence was obtained. The last column  
1146 show the 16S and ITS1 sequences that have been incorporated to the study in order to  
1147 test the species hypothesis with the multispecies coalescent models.

1148 **Table S2.** Sites retrieved from literature and GenBank where *Galba* species were  
1149 molecularly identified in America. Both the *Galba* and *Lymnaea* names have been used  
1150 in the literature at genus level for the species considered in our study—we used *Galba*  
1151 here for this monophyletic group of small lymnaeids. For each site, we report the  
1152 country, site, geographical coordinates available sequences of mitochondrial (COI and  
1153 16S) and nuclear (ITS1 and ITS2) genes, species identification by specific  
1154 microsatellites, bibliographic reference, and the species name used in the reference.  
1155 Coordinates from Owego, New York were obtained from GoogleEarth and those from  
1156 Correa et al. (2010) from Correa et al. (2011). Some coordinates were corrected in order  
1157 to match the specific site: Rio Negro (Argentina) from Correa et al. (2010), Frias  
1158 (Argentina) from Correa et al. (2011) and Lounnas et al. (2017a), Estanque Lagunillas  
1159 (Venezuela) from BARGUES et al. (2011c), Baños del Inca (Peru) from BARGUES et al.  
1160 (2012), Paysandú (Uruguay) from Lounnas et al. (2017a) and Geffrier (Guadeloupe)

1161 (provided by the authors). The KT461809 sequence was erroneously tagged as an ITS2  
1162 sequence, but is, in fact, a COI sequence. Sequences of the individuals molecularly  
1163 identified by (Medeiros et al. 2014) are missing in the original publication and were not  
1164 uploaded to GenBank. ND, no data available.

1165 **Table S3.** Sites retrieved from literature and GenBank where *Galba* species were  
1166 molecularly identified in Europe, Asia, and Africa. Coordinates that were not given in  
1167 the original articles or in GenBank were best-guess estimated. The information reported  
1168 for each site is as in Table S2. ND, no data available.

1169 **Table S4.** Nested sampling results for the eleven species-delimitation models shown in  
1170 Figure S13. The model with the higher Marginal Likelihood estimate is the top-ranked  
1171 model. All Bayes factor (BF) calculations are made against the current taxonomy model  
1172 (scenario D). Therefore, negative BF values indicate support for the current taxonomy  
1173 model, and positive BF values indicate support for the alternative model.

1174 **Table S5.** Species of small, mud-dwelling lymnaeids recognized by Burch (1982) in  
1175 North America. The author grouped the 22 species into the genus *Fossaria* with two  
1176 subgenera, *Fossaria* (*s.s.*) and *Bakerilymnaea*.

1177

1178 **Figure captions**

1179 **Figure S1.** Four evolutionary processes that can lead to cryptic species illustrated by  
1180 their phylogenetic histories. (A) Recent divergence: cryptic species are very closely  
1181 related and only recently diverged from each other and, thus, the rate of morphological  
1182 disparity between them (A1 and A2) is not substantially different from that for non-  
1183 cryptic species. (B) Parallelism: the cryptic species are not very closely related to each  
1184 other and the rate of morphological disparity for non-cryptic species is much greater  
1185 than that for cryptic species. (C) Convergence: the cryptic species are also not closely  
1186 related to each other. Initially, morphological disparity for cryptic species can change in  
1187 a manner similar to that for the non-cryptic species pair. However, at some point,  
1188 morphological disparity decreases for the cryptic species, while continuing to increase  
1189 between non-cryptic taxa. (D) Stasis: the cryptic species are closely related to each  
1190 other or are part of a species complex and diverged a long time ago. In comparison with  
1191 non-cryptic species, the rate of morphological change is substantially reduced. (Figure  
1192 and legend extracted and modified from Struck et al. 2018).

1193 **Figure S2.** First two planes of a principal component analysis on reproductive traits in  
1194 Lymnaeid species. These planes represent 80.36% of the total variance. The analysis  
1195 was conducted using the following measurements: prostate height, prostate width, penis  
1196 length, preputium length, anterior and posterior widths of the penis sheath, and shell  
1197 length and width. All variables were ln-transformed. This analysis included most of the  
1198 species considered in our work, as well as *Pseudosuccinea columella* (one of the closest  
1199 relative of *Galba* spp.), sampled in Argentina, Colombia, Cuba, France, Guadeloupe,  
1200 Peru and Venezuela. Each point represents an individual (N = 81). (Figure and legend  
1201 extracted and modified from Correa et al. 2011).

1202 **Figure S3.** Geographic distribution of *Galba cubensis*, *Galba schirazensis* and *Galba*  
1203 *truncatula* in the European, Asian and African samples retrieved from GenBank.

1204 Coordinates are given in Table S3.

1205 **Figure S4.** Shells and reproductive and urinary systems of the six *Galba* species  
1206 studied. *Galba cousini/meridensis* is the only species that can be morphologically  
1207 identified.

1208 **Figure S5.** Phylogenetic tree of *Galba* species based on Bayesian inference in Beast2 of  
1209 the COI gene. All sequences from the current study, as well as the ones retrieved from  
1210 GenBank, are included in this tree. Sequence coloration represents species. Arrows  
1211 indicate sequences belonging to a type locality (see Table 1 for details). Sequence data  
1212 are given in Tables S1, S2, and S3.

1213 **Figure S6.** Phylogenetic tree of *Galba* species based on Bayesian inference in Beast2 of  
1214 the 16S gene. All sequences were retrieved from GenBank except for sequences from  
1215 individuals from Bosque del Apache (USA). Sequence coloration represents species.  
1216 Arrows indicate sequences belonging to a type locality (see Table 1 for details).  
1217 Sequence data are given in Tables S1, S2, and S3.

1218 **Figure S7.** Phylogenetic tree of *Galba* species based on Bayesian inference in Beast2 of  
1219 the ITS1 gene. All sequences were retrieved from GenBank except for sequences from  
1220 individuals from Bosque del Apache (USA). Sequence coloration represents species.  
1221 Arrows indicate sequences belonging to a type locality (see Table 1 for details).  
1222 Sequence data is given in Tables S1, S2, and S3.

1223 **Figure S8.** Phylogenetic tree of *Galba* species based on Bayesian inference in Beast2 of  
1224 the ITS2 gene. All sequences for the current study, as well as the ones retrieved from  
1225 GenBank, are included in this tree. Sequence coloration represents species. Arrows

1226 indicate sequences belonging to a type locality (see Table 1 for details). Sequence data  
1227 are given in Tables S1, S2, and S3.

1228 **Figure S9.** Haplotype network of *Galba* species based on 16S gene. Circle sizes are  
1229 proportional to haplotype frequencies and colors represent species. The number of  
1230 mutations separating circles are indicated by dashes. The six clusters detected in the  
1231 phylogenetic analysis are represented as grey shapes.

1232 **Figure S10.** Haplotype network of *Galba* species based on COI gene. Circle sizes are  
1233 proportional to haplotype frequencies and colors represent species. The number of  
1234 mutations separating circles are indicated by dashes. The six clusters detected in the  
1235 phylogenetic analysis are represented as grey shapes.

1236 **Figure S11.** Haplotype network of *Galba* species based on ITS1 gene. Circle sizes are  
1237 proportional to haplotype frequencies and colors represent species. The number of  
1238 mutations separating circles are indicated by dashes. The six clusters detected in the  
1239 phylogenetic analysis are represented as grey shapes.

1240 **Figure S12.** Haplotype network of *Galba* species based on ITS2 gene. Circle sizes are  
1241 proportional to haplotype frequencies and colors represent species. The number of  
1242 mutations separating circles are indicated by dashes. The six clusters detected in the  
1243 phylogenetic analysis are represented as grey shapes.

1244 **Figure S13.** Scenarios for species assignments used to run the multispecies tree models  
1245 using Multi-Threaded Nested Sampling in StarBeast2. The scenario K is an unreal  
1246 scenario that separates the populations of *G. viator* from Argentina and Chile to test  
1247 whether splitter models showed higher support than lumpers models regardless its  
1248 biological sense.



## Step 1: Morphological study

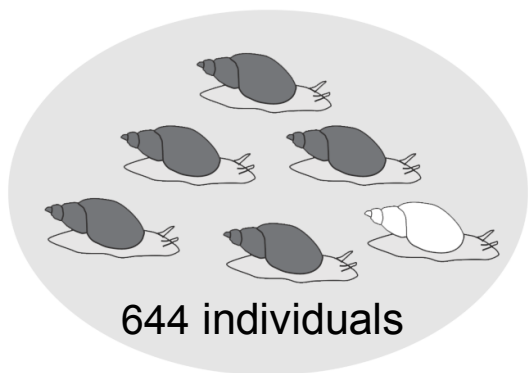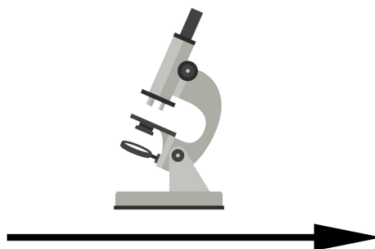

*Galba cousini*

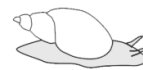

1 individual

## Step 2: Multiplex PCR

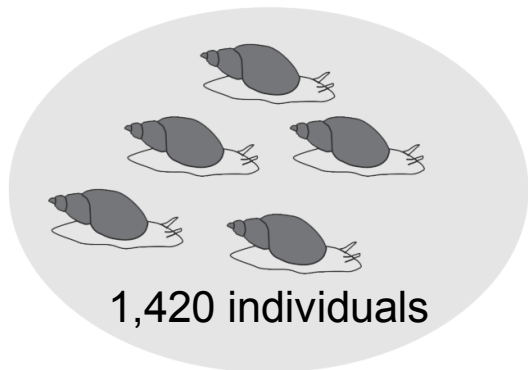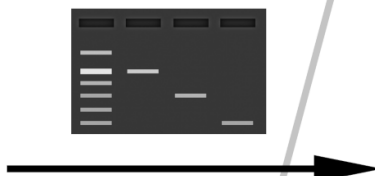

*Galba cubensis*  
*Galba schirazensis*  
*Galba truncatula*

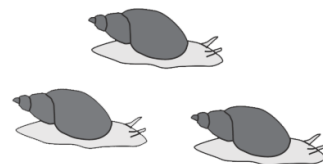

112 individuals

## Step 3: ITS2 and/or COI sequencing

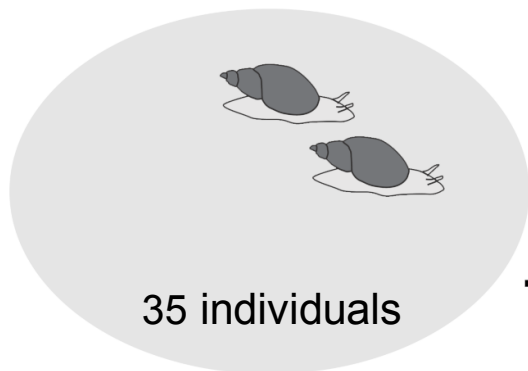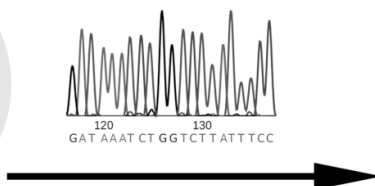

*Galba humilis*  
*Galba viator*

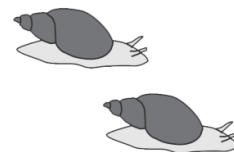

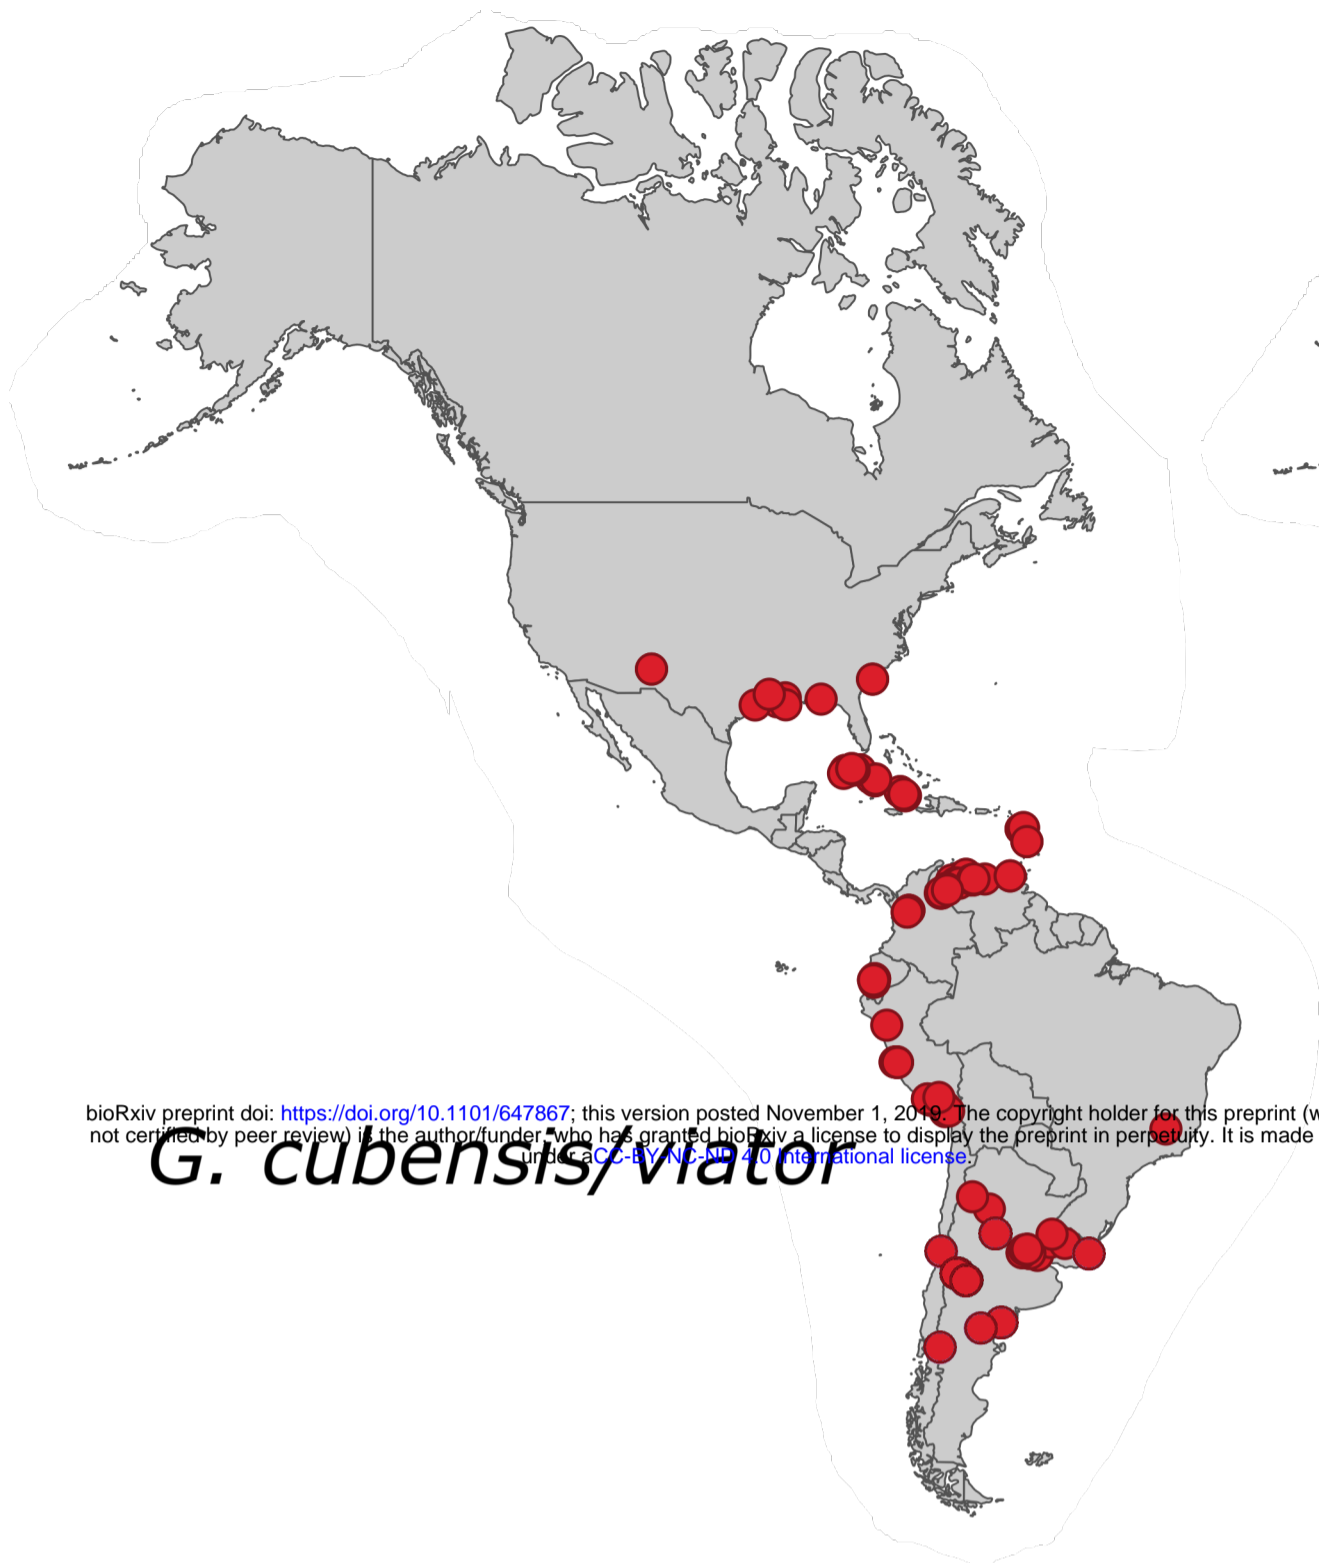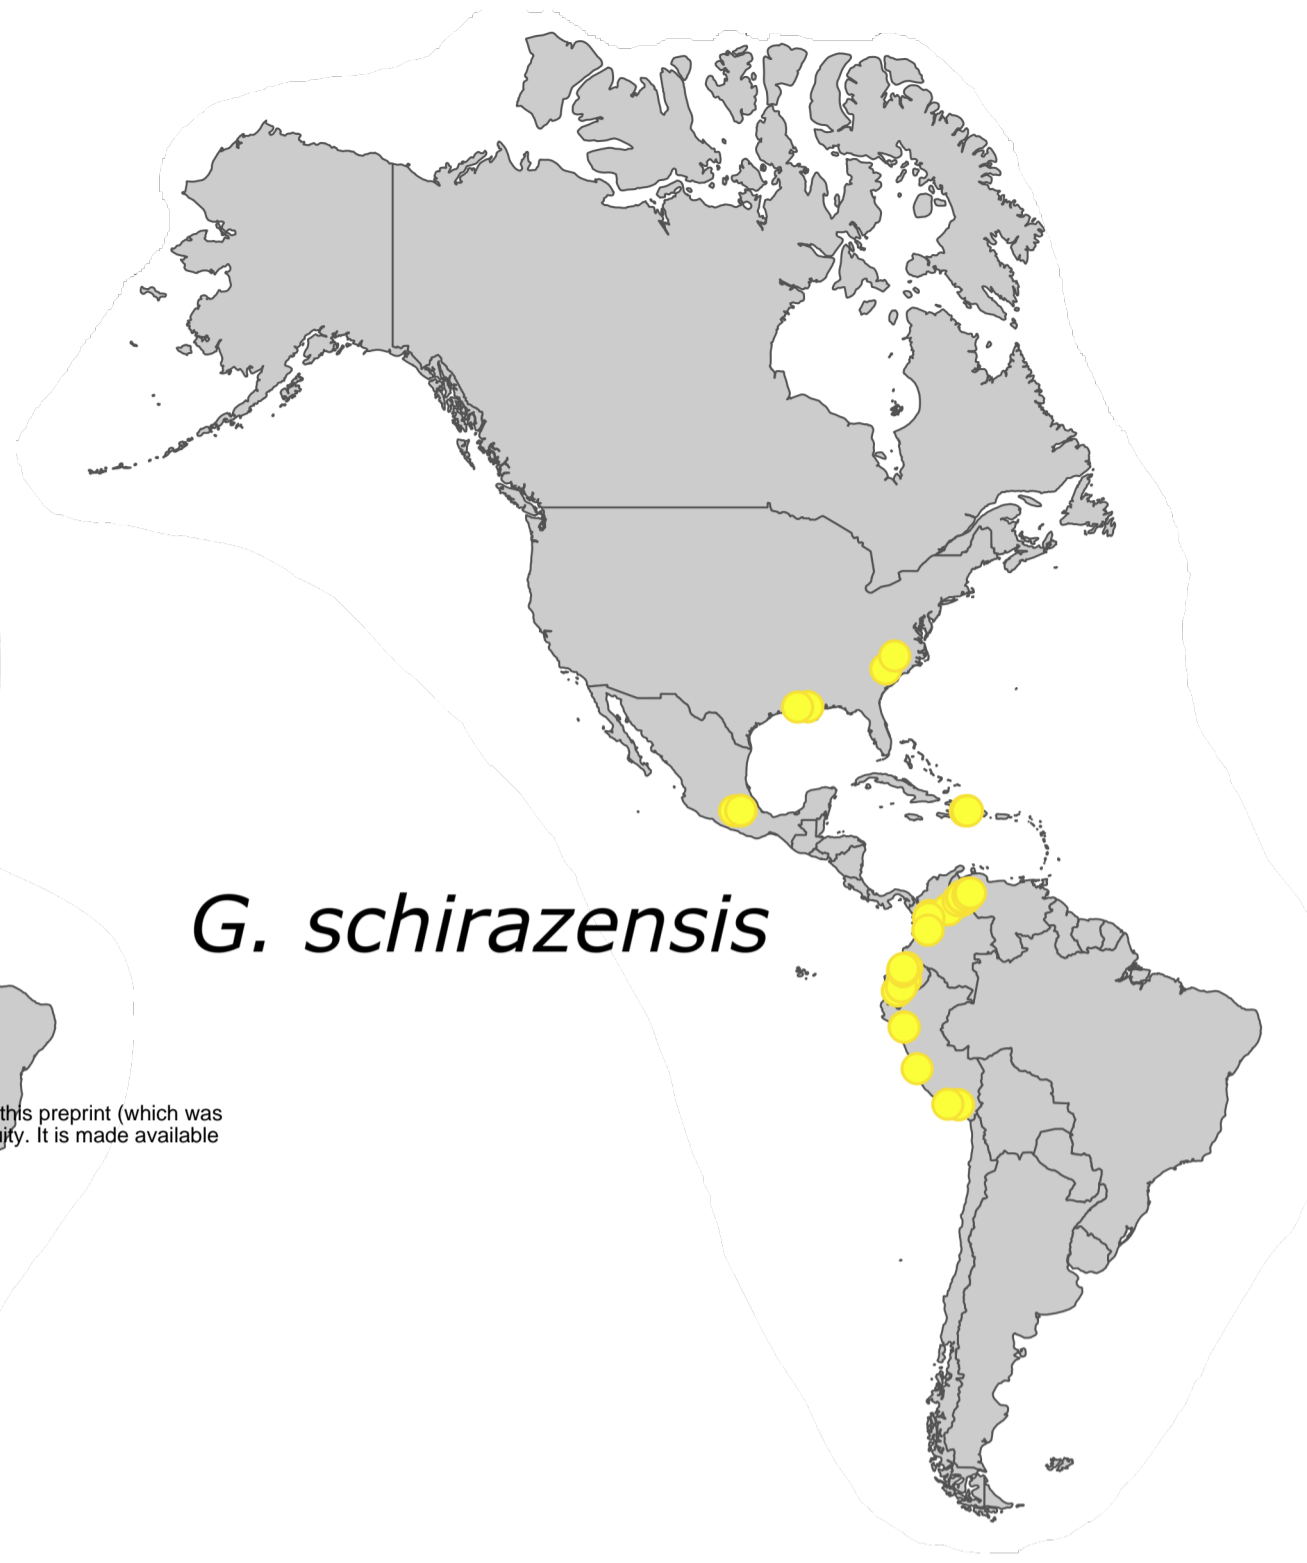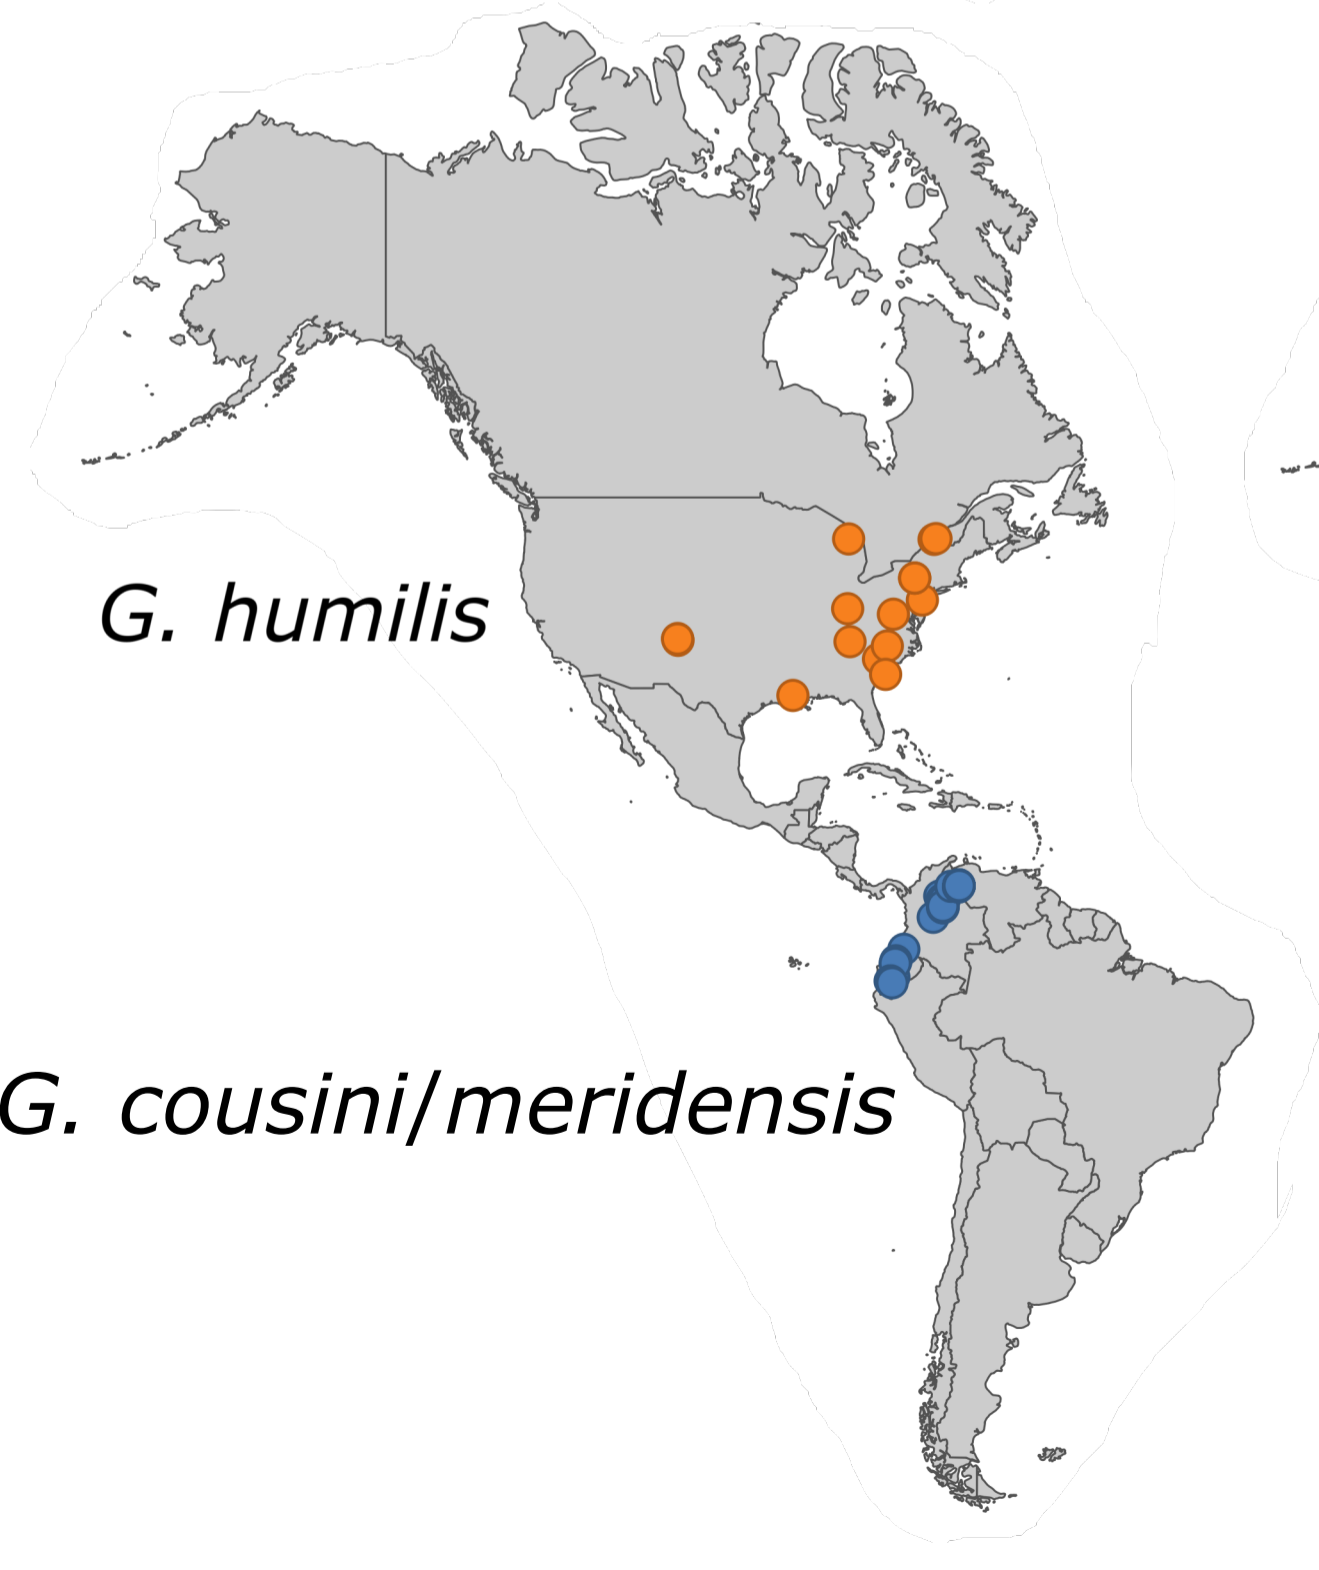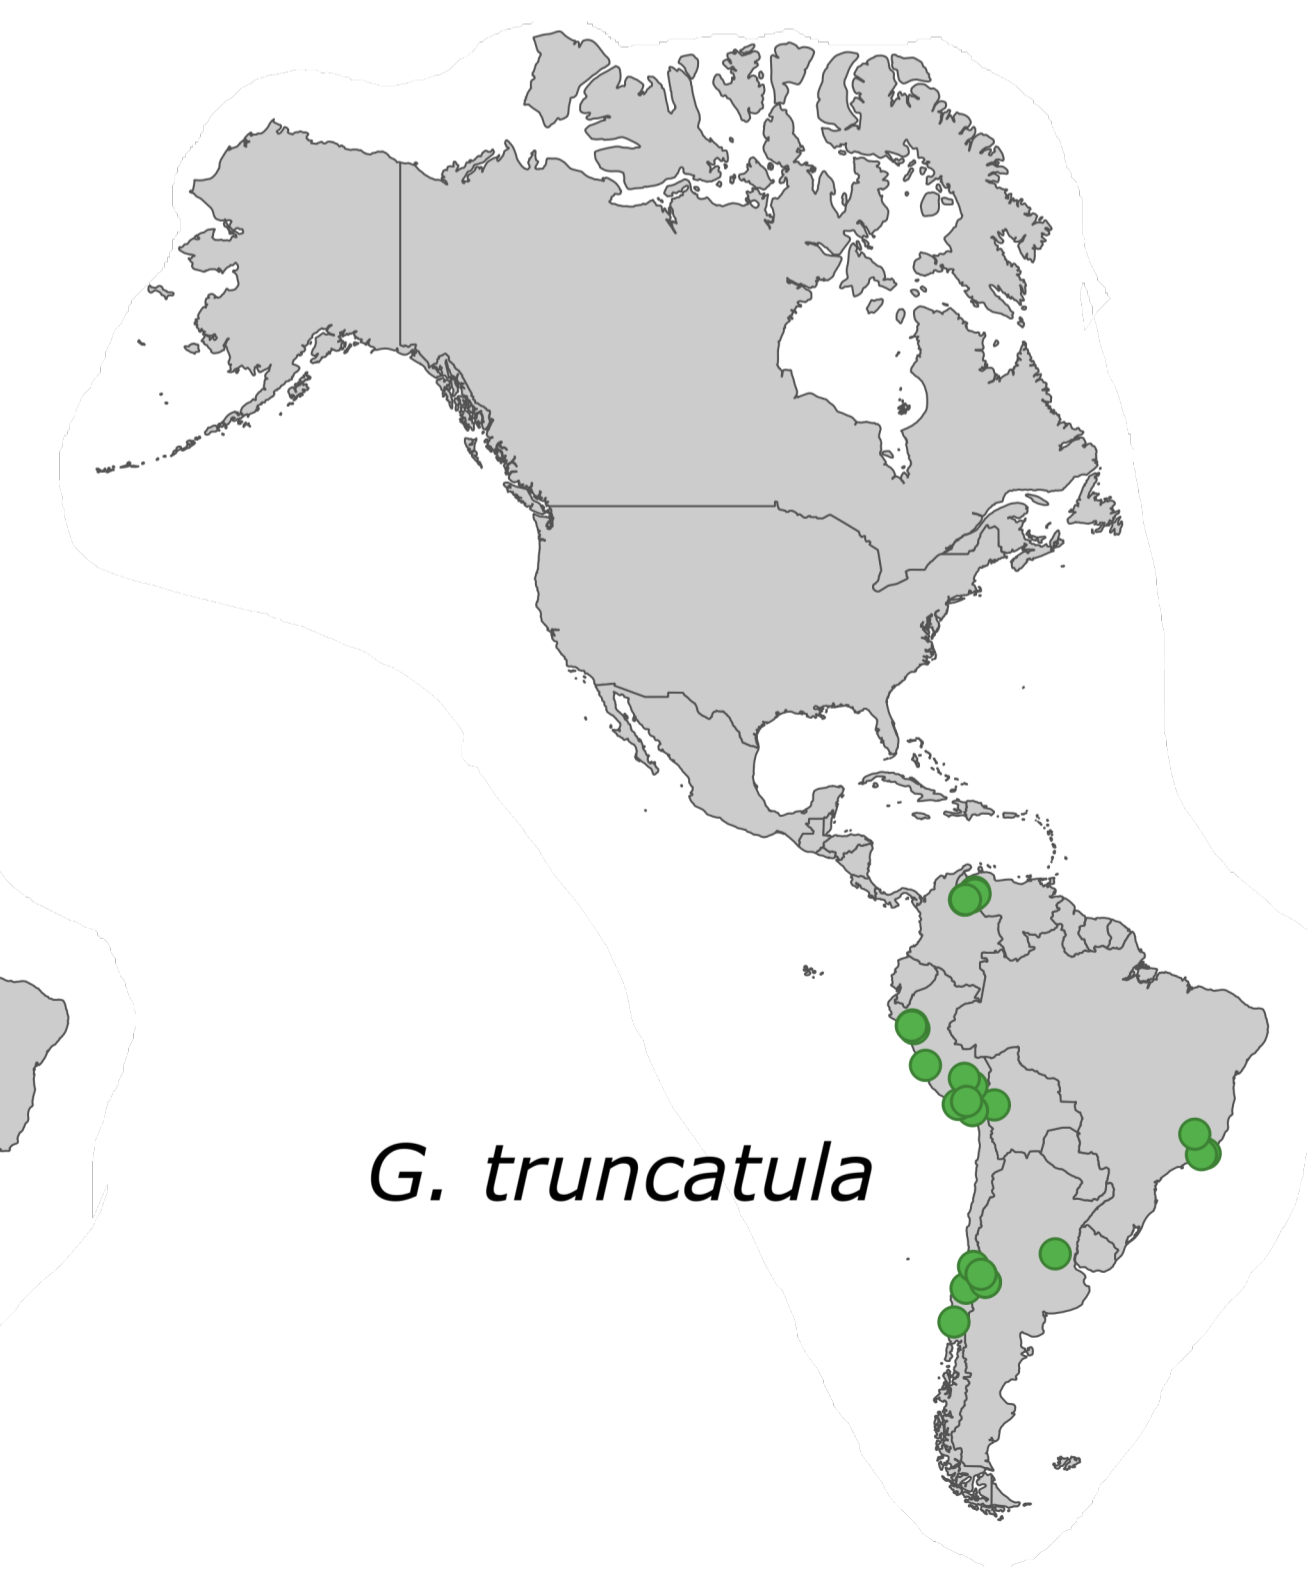



S-DEC

S-DIVA

bioRxiv preprint doi: <https://doi.org/10.1101/647807>; this version posted November 1, 2019. The copyright holder for this preprint (which was not certified by peer review) is the author/funder, who has granted bioRxiv a license to display the preprint in perpetuity. It is made available under aCC-BY-NC-ND 4.0 International license.

BBM

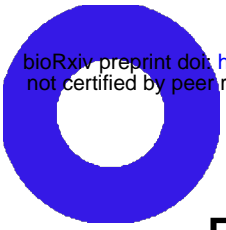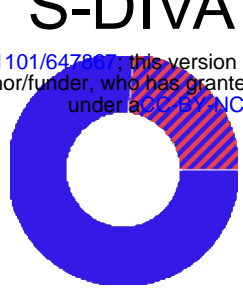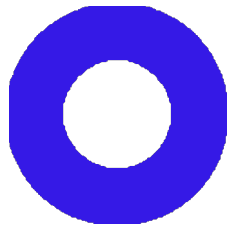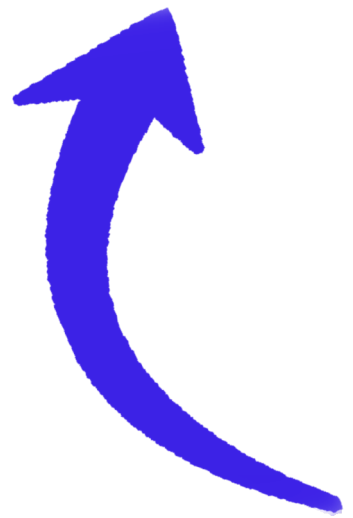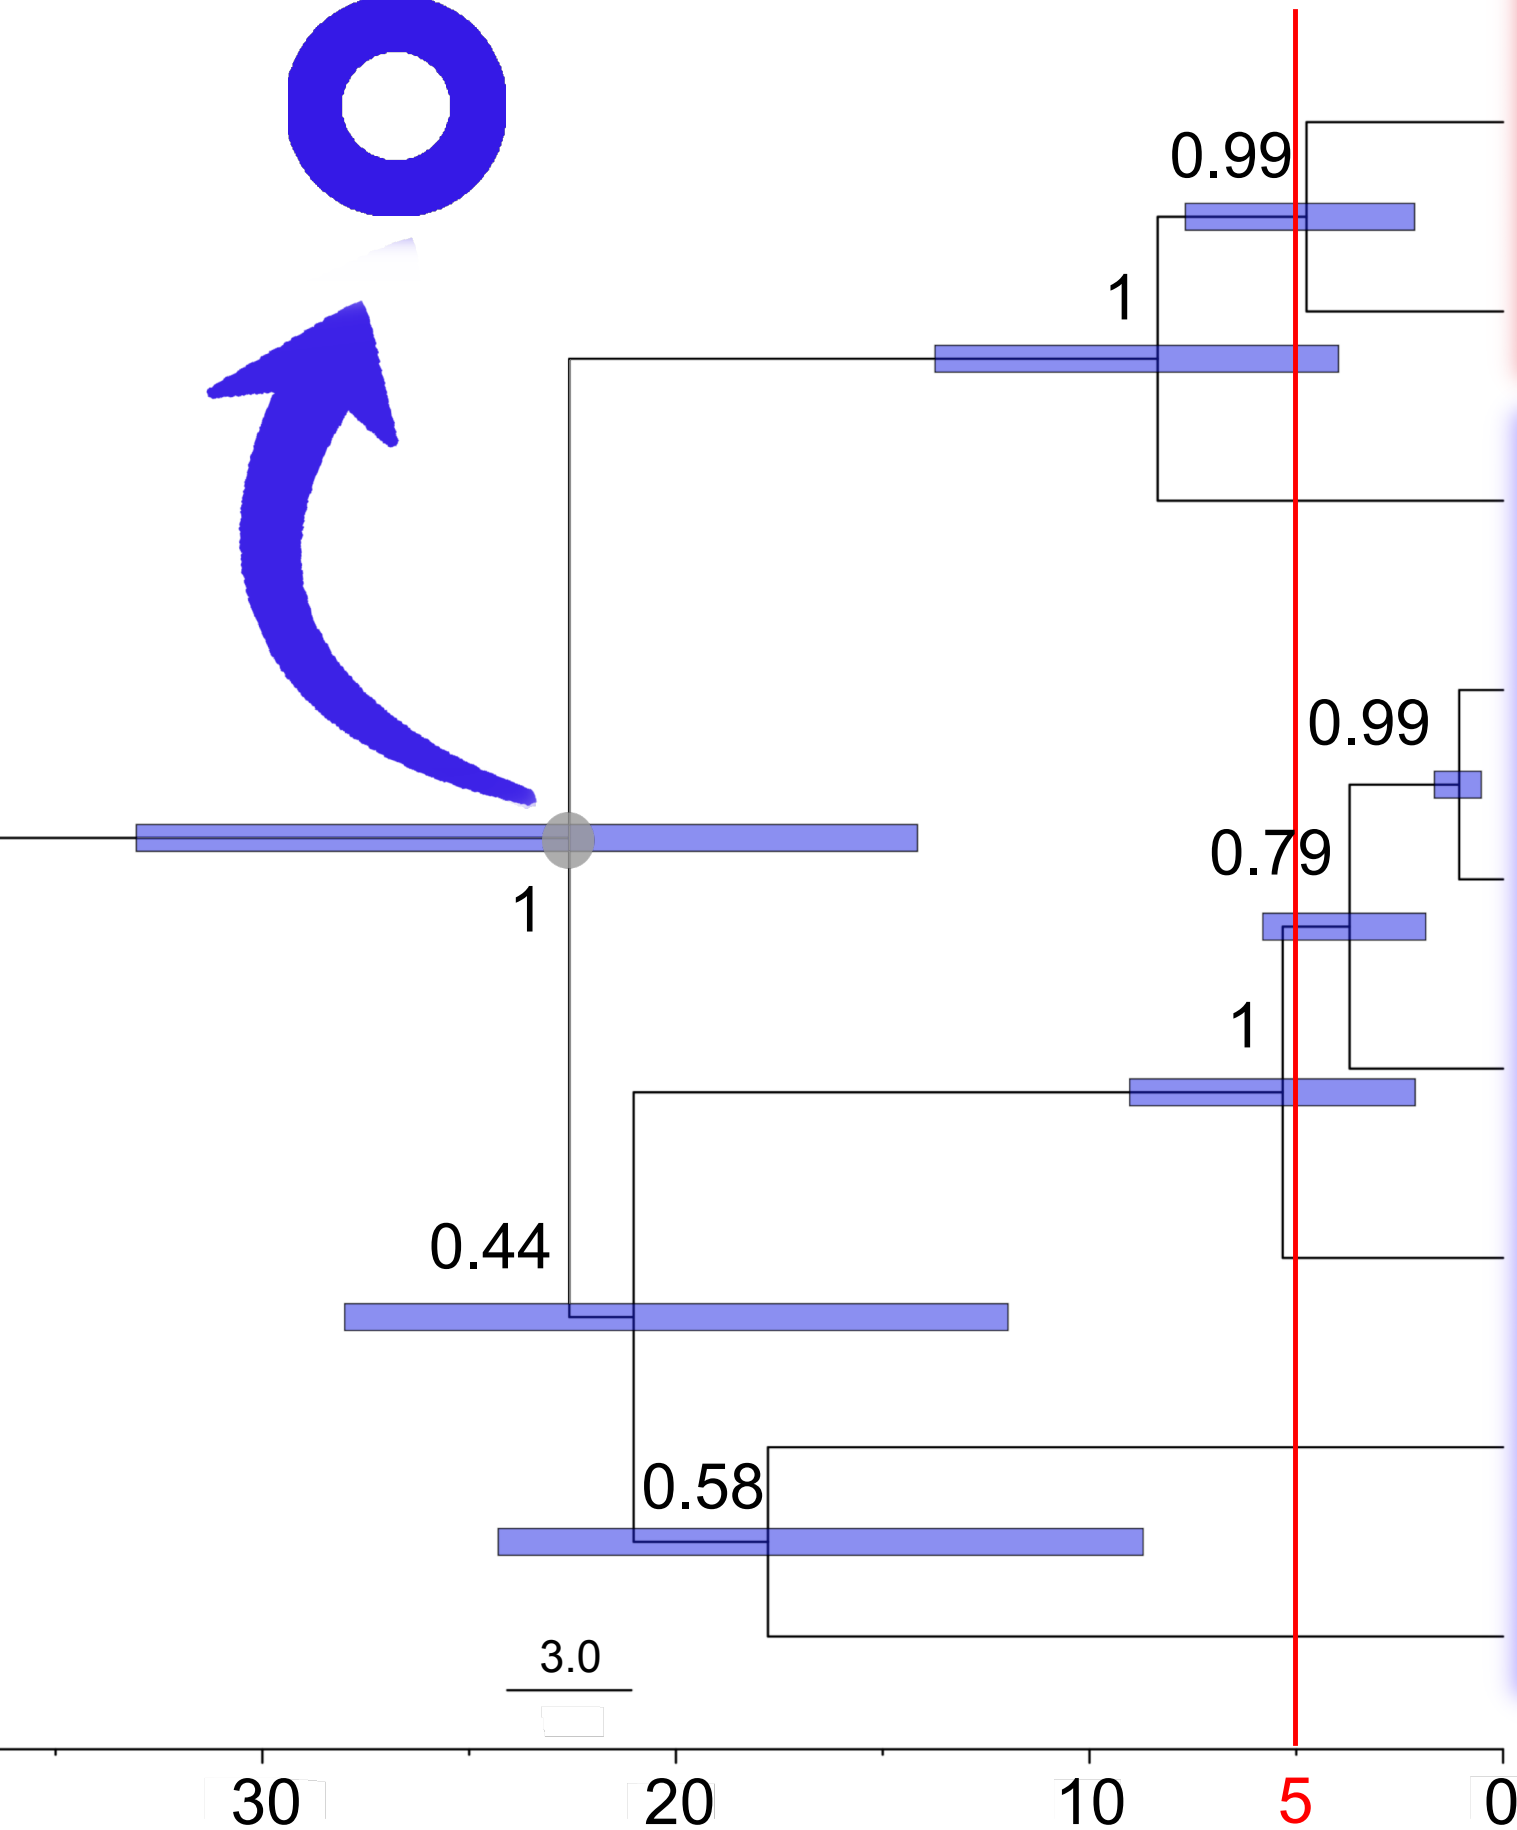

OUTCROSSERS

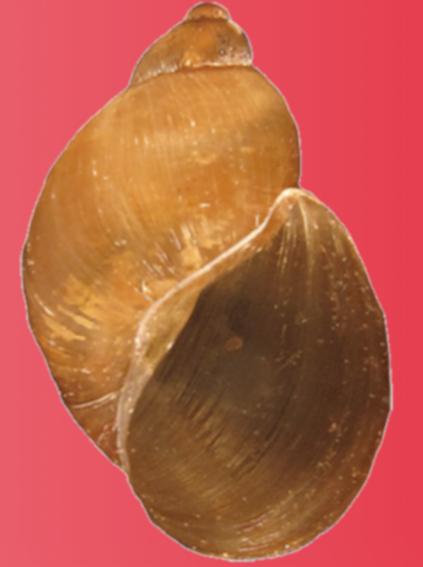

*Galba cousini* IV

*Galba meridensis* V

*Galba humilis* III

SELFERS

*Galba neotropica*

*Galba cubensis*

*Galba viator*

*Galba* sp.

Bosque del Apache

*Galba truncatula* I

*Galba schirazensis* II

VI

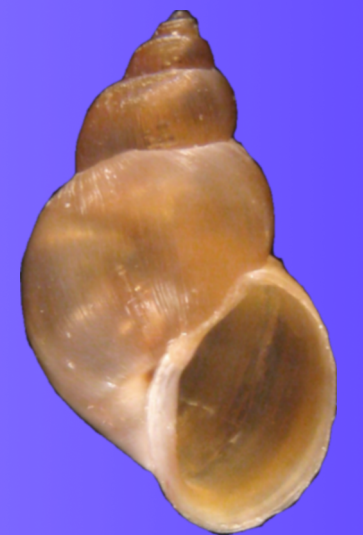

Mya
